# Supplementary material for: TBAI-assisted direct C–H activation of indoles with β-E-styrene sulfonyl hydrazides: a stereoselective access to 3-styryl thioindoles
Source: Royal Society of Chemistry journal article supplement (doi:10.1039/d1ra02444b), 2021-01-01
Supplement: d1ra02444b1.pdf [file d1ra02444b1.pdf]

# Supporting Information

**TBAI Assisted Direct C-H Activation of Indoles with  $\beta$ -E-Styrene Sulfonyl Hydrazides: A Stereo selective Access to 3- Styryl Thioindoles.**

**Saira Hafeez<sup>a</sup> and Aamer Saeed<sup>b\*</sup>**

<sup>a</sup>Department of Chemistry, University of Science and Technology of China, Hefei, Anhui 230026, China

<sup>b</sup>Department of Chemistry, Quaid-I-Azam University, 45320, Islamabad, Pakistan

## Table of Contents

|                                                                |      |
|----------------------------------------------------------------|------|
| Copies of <sup>1</sup> H NMR, <sup>13</sup> C NMR Spectra..... | S-2  |
| ESI-MS Analysis of the Reaction Product.....                   | S-37 |
| ESI-MS Analysis of the Reaction Intermediate.....              | S-46 |

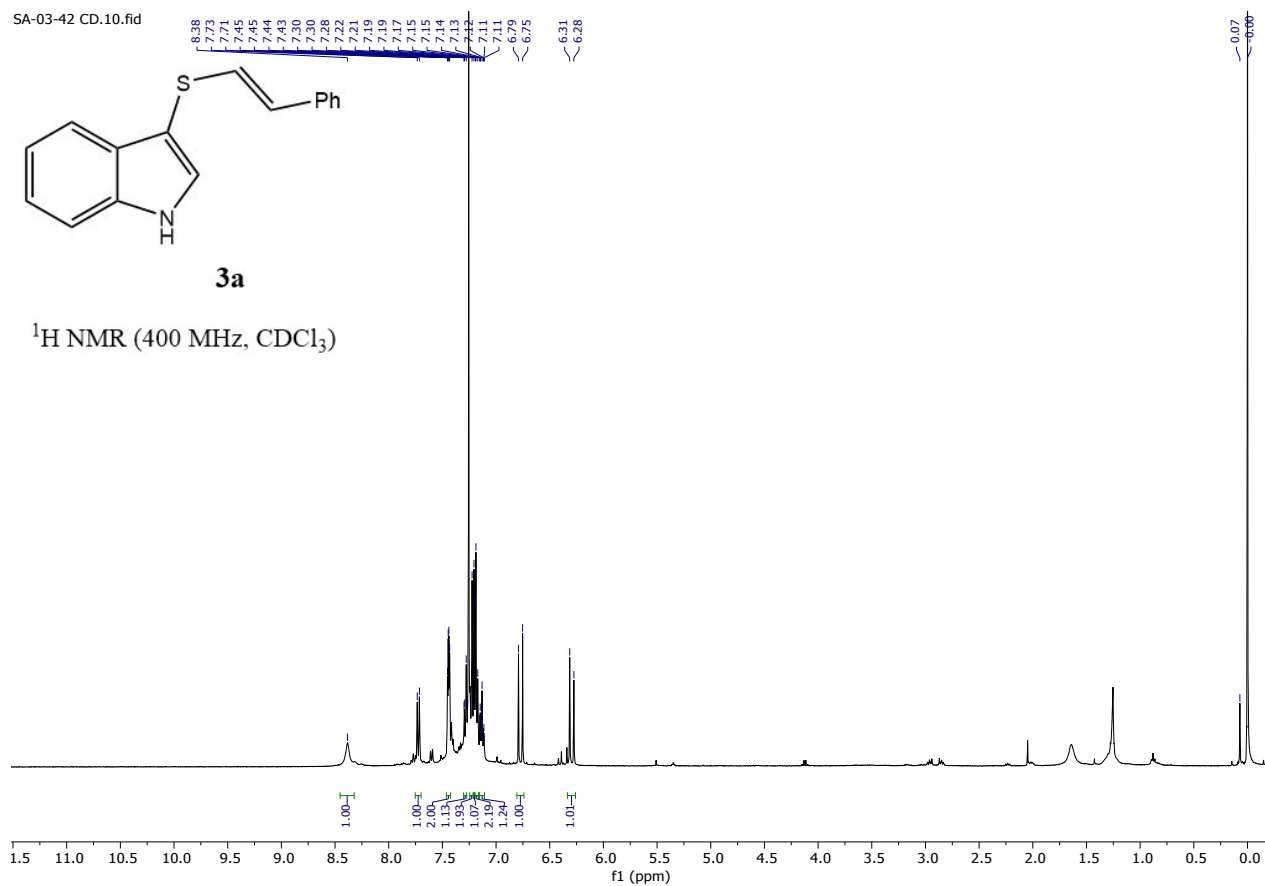

Fig. 1  $^1\text{H NMR}$  Spectrum of (*E*)-3-(Styrylthio)- $^1\text{H}$ -indole **3a**

sa-03-42.2.fid

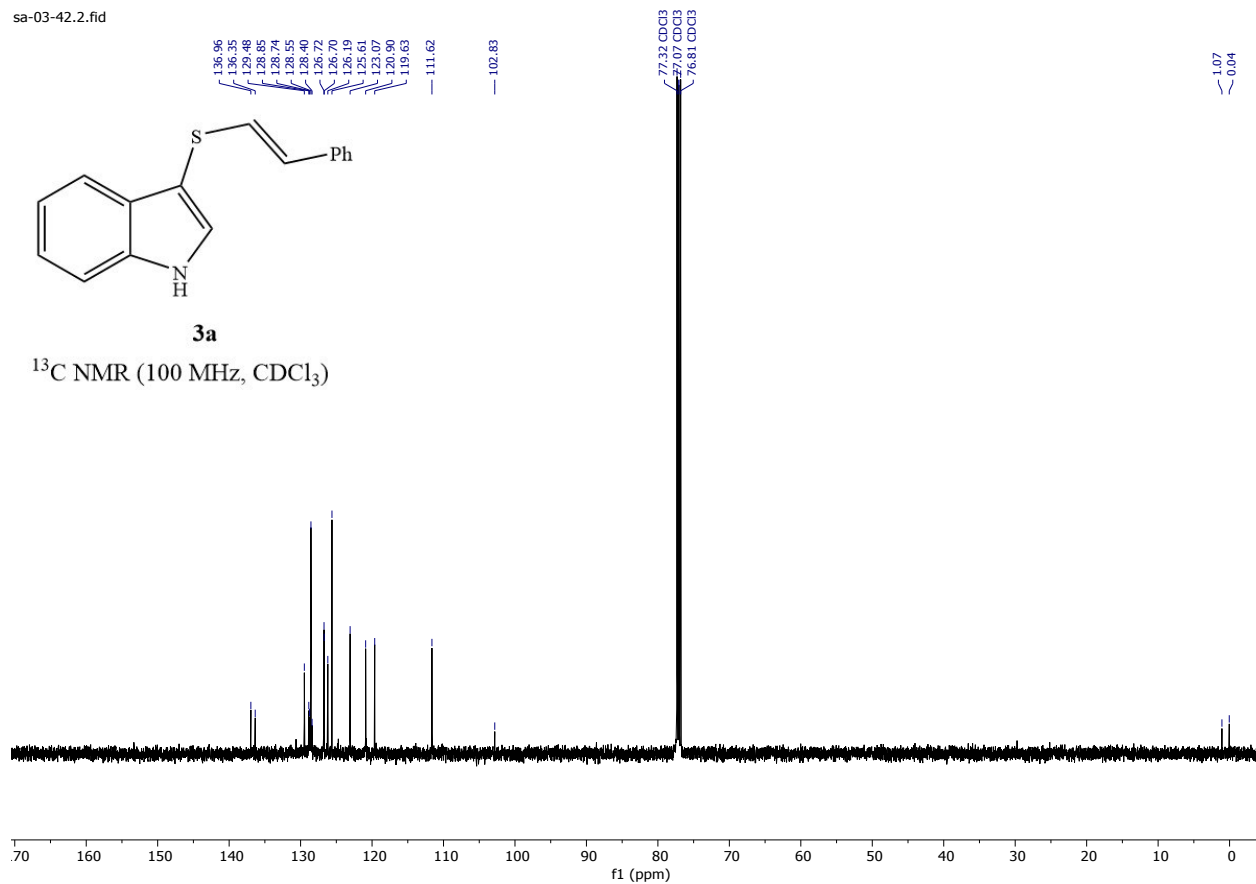

Fig. 2  $^{13}\text{C}$  NMR Spectrum of (*E*)-3-(Styrylthio)- $^1\text{H}$ -indole **3a**

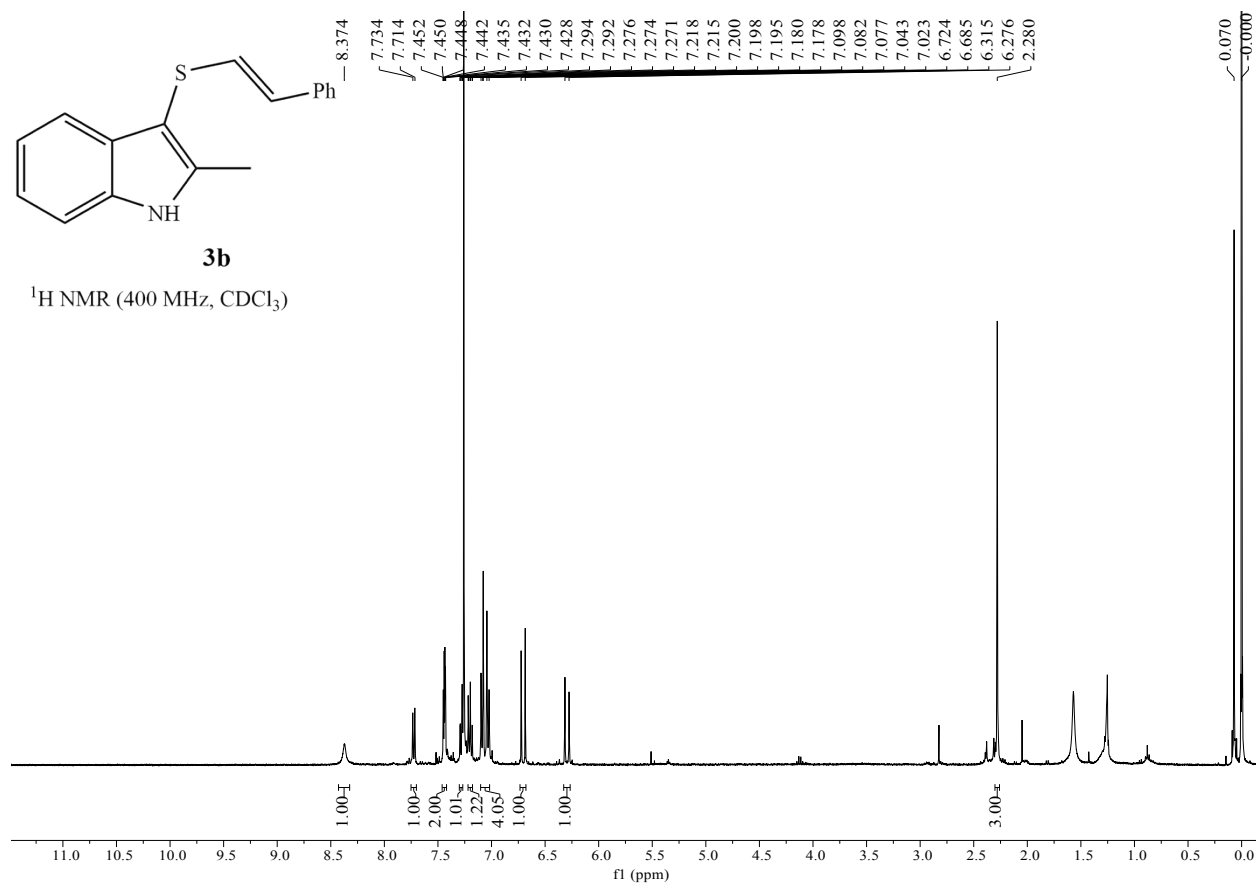

Fig. 3 <sup>1</sup>H NMR Spectrum of (*E*)-2-methyl-3-(styrylthio)-1*H*-indole **3b**

sa03-78.2.fid

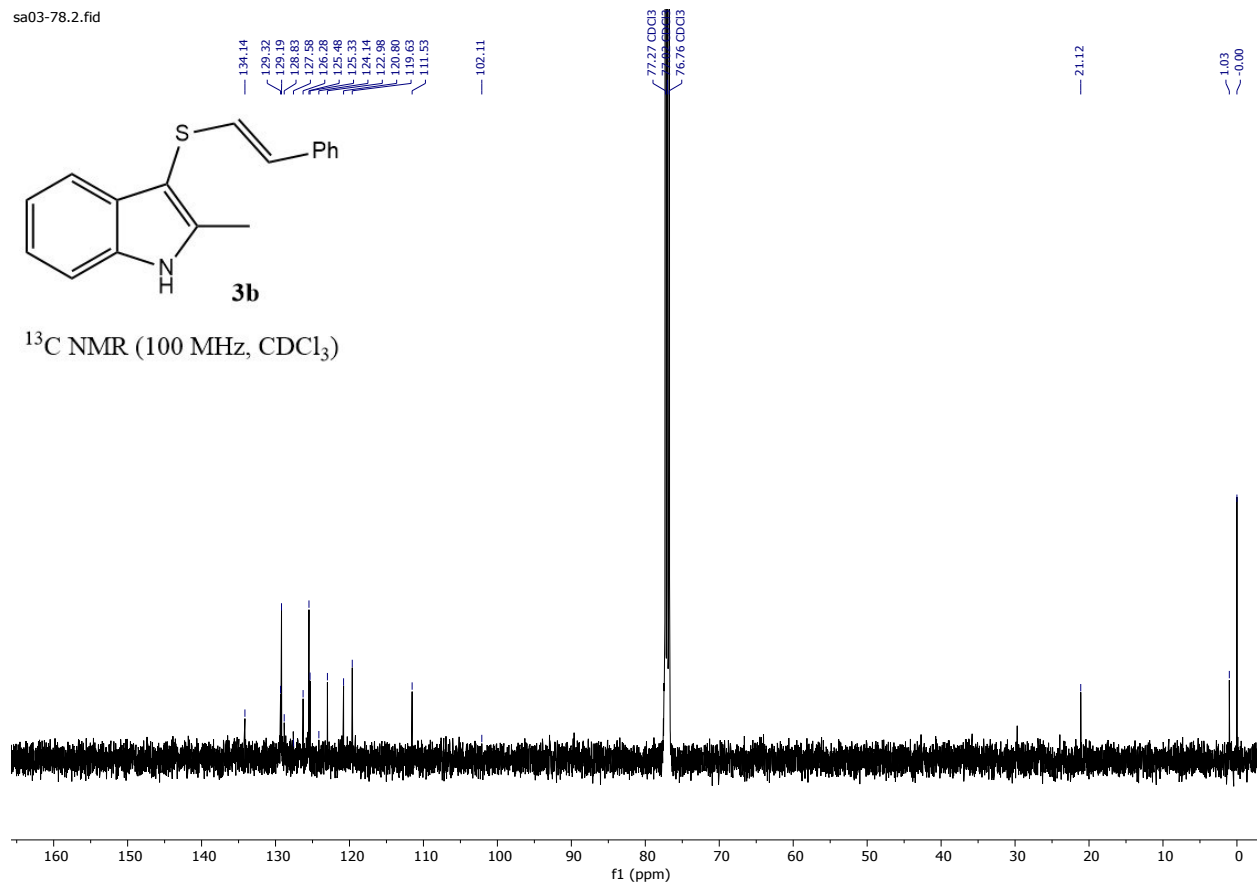

Fig. 4  $^{13}\text{C}$  NMR Spectrum of (*E*)-2-methyl-3-(styrylthio)-1*H*-indole **3b**

SA-03-80

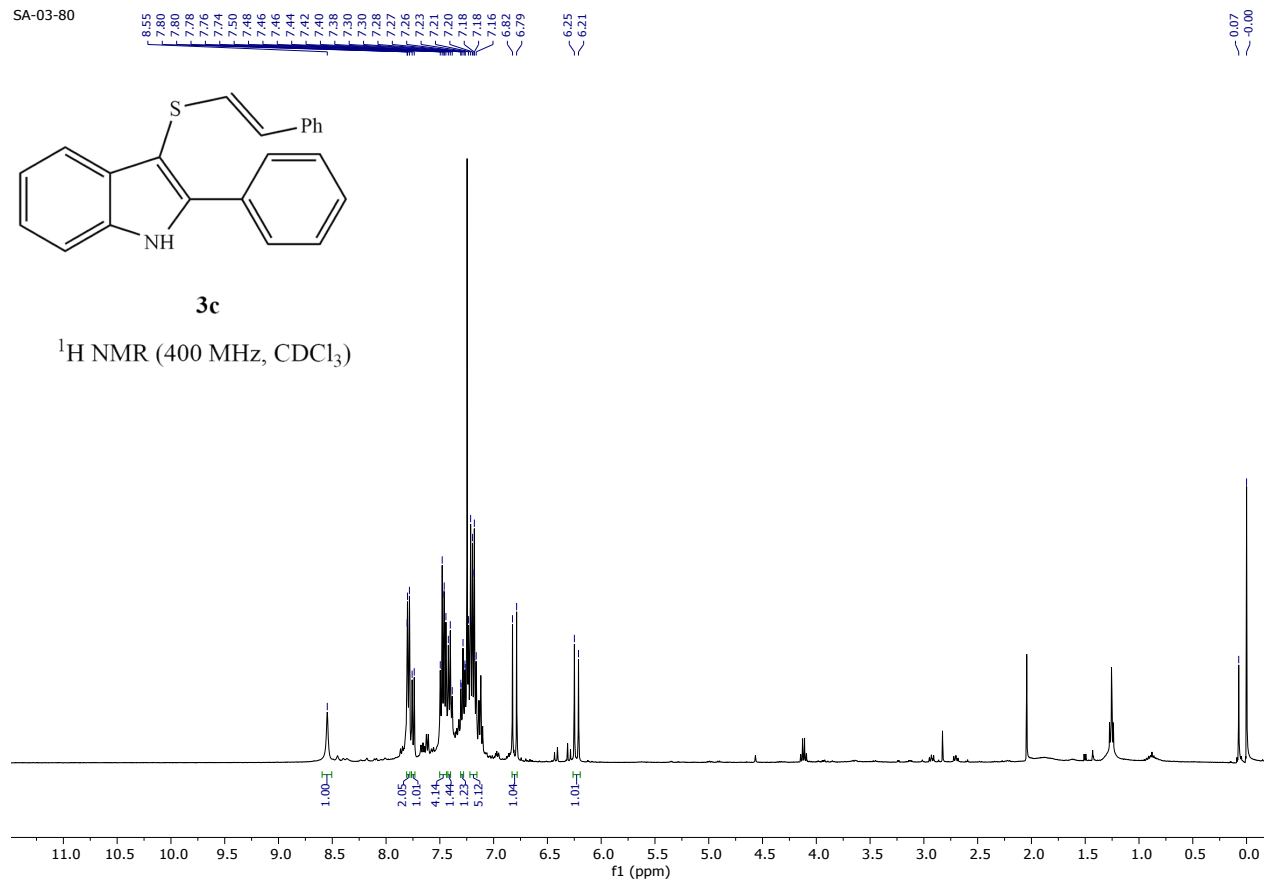

Fig. 5  $^1\text{H NMR}$  Spectrum of (*E*)-2-phenyl-3-(styrylthio)-1*H*-indole **3c**

sa03-80

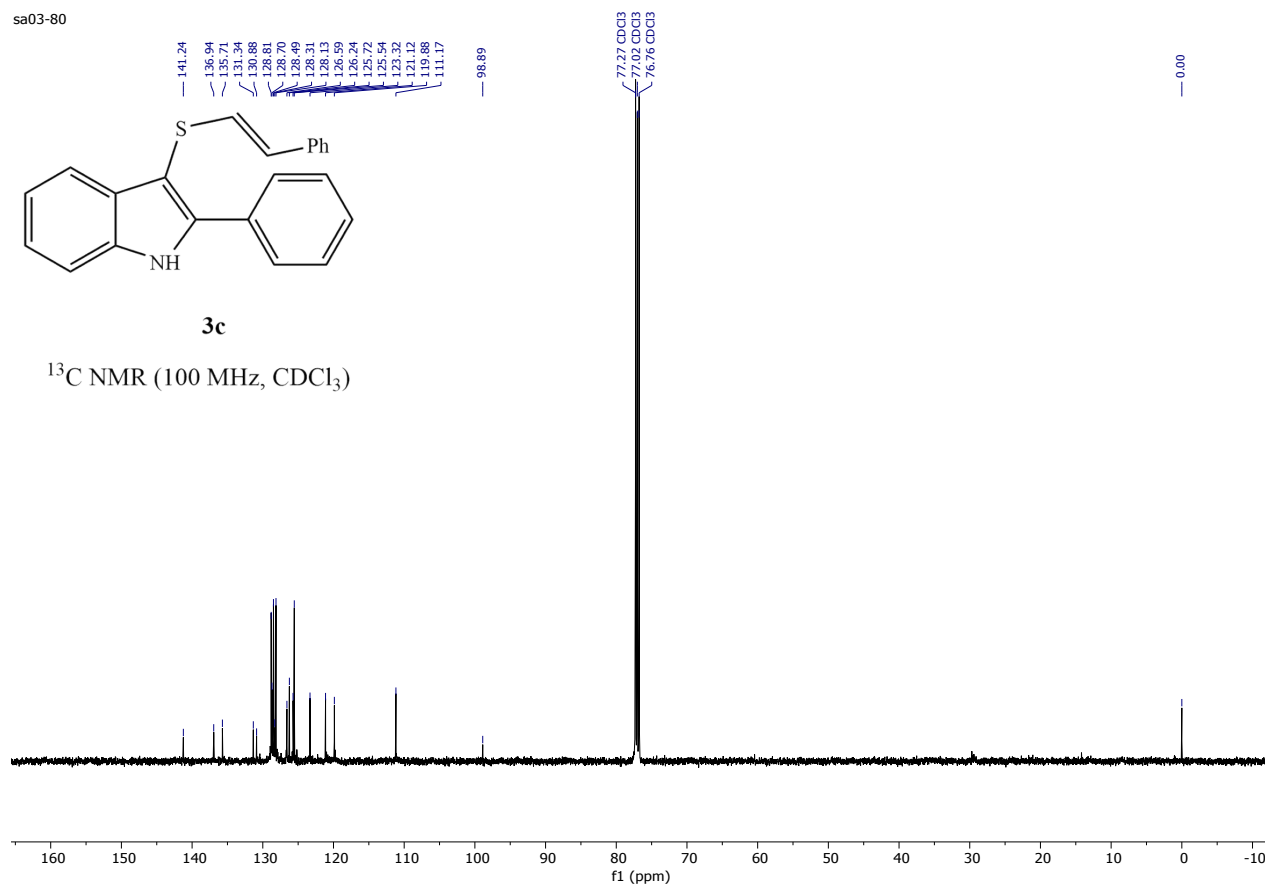

Fig. 6  $^{13}\text{C}$  NMR Spectrum of (*E*)-2-phenyl-3-(styrylthio)-1*H*-indole **3c**

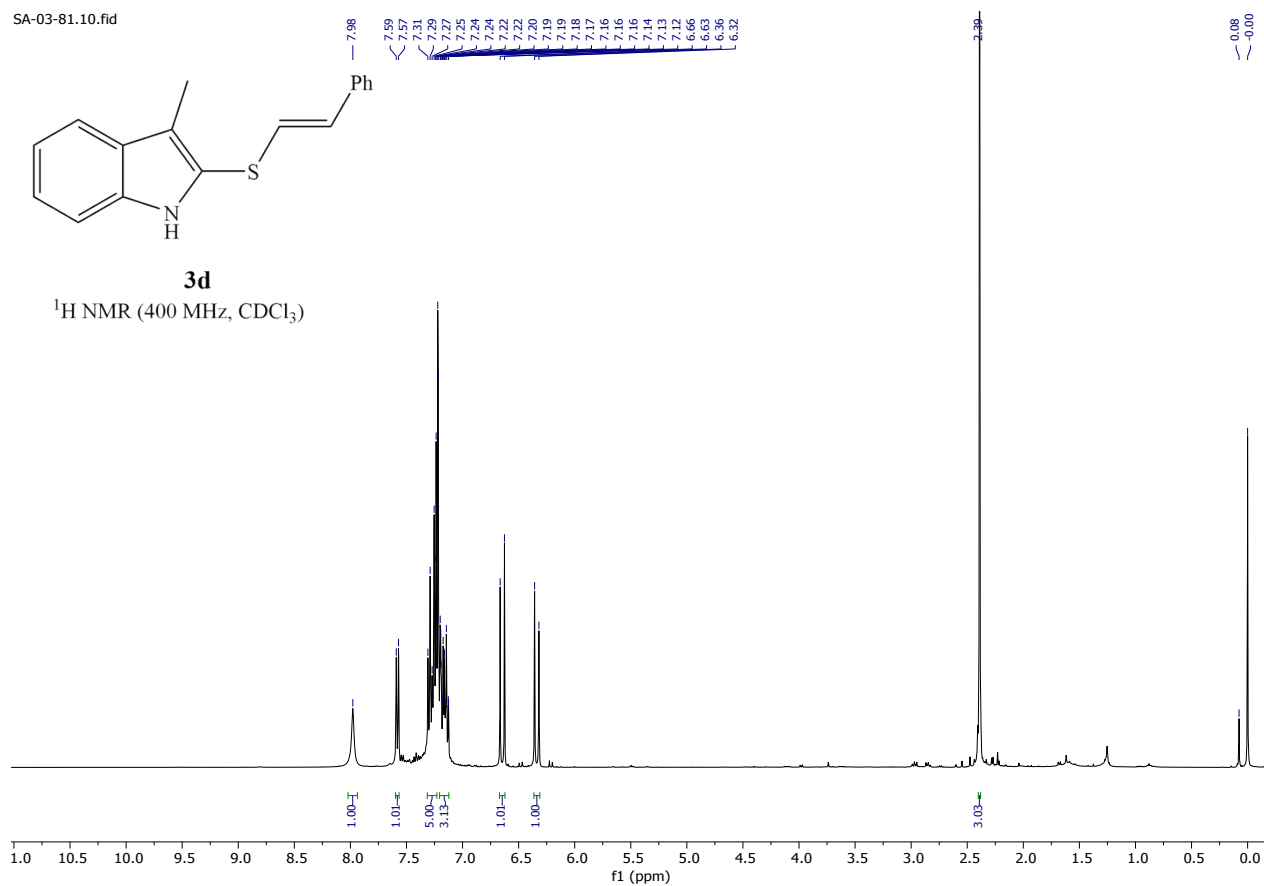

Fig. 7 <sup>1</sup>H NMR Spectrum of (*E*)-3-methyl-2-(styrylthio)-1*H*-indole **3d**



sa-03-81.1.fid

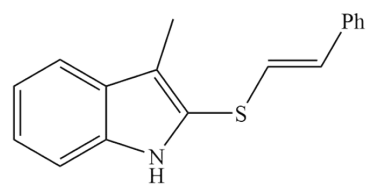

**3d**

$^{13}\text{C}$  NMR (100 MHz,  $\text{CDCl}_3$ )

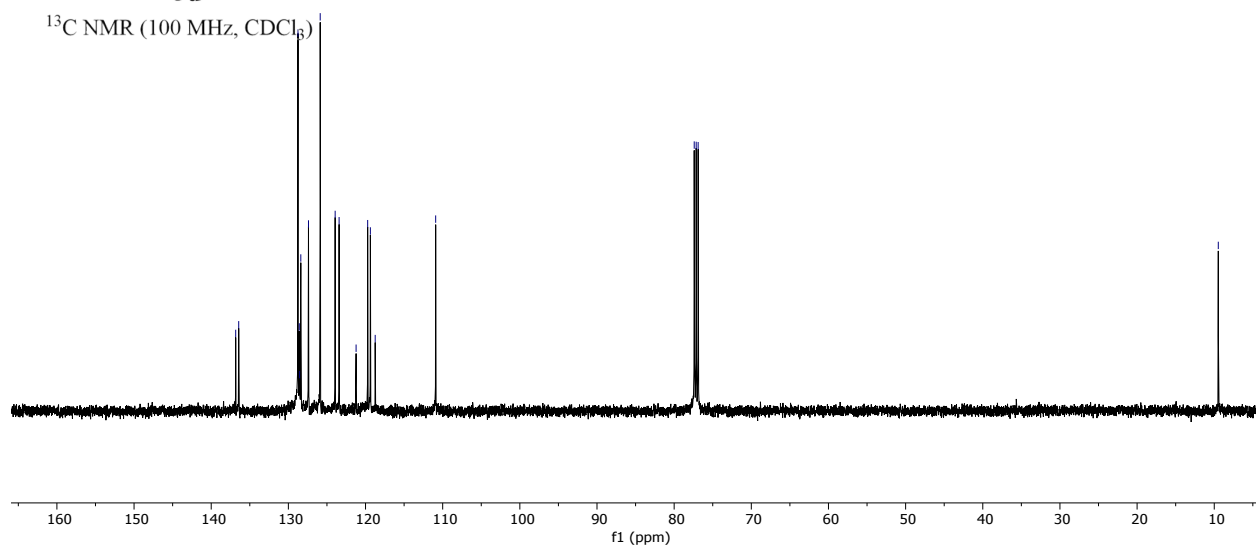

Fig. 8  $^{13}\text{C}$  NMR Spectrum of (*E*)-3-methyl-2-(styrylthio)-1*H*-indole **3d**

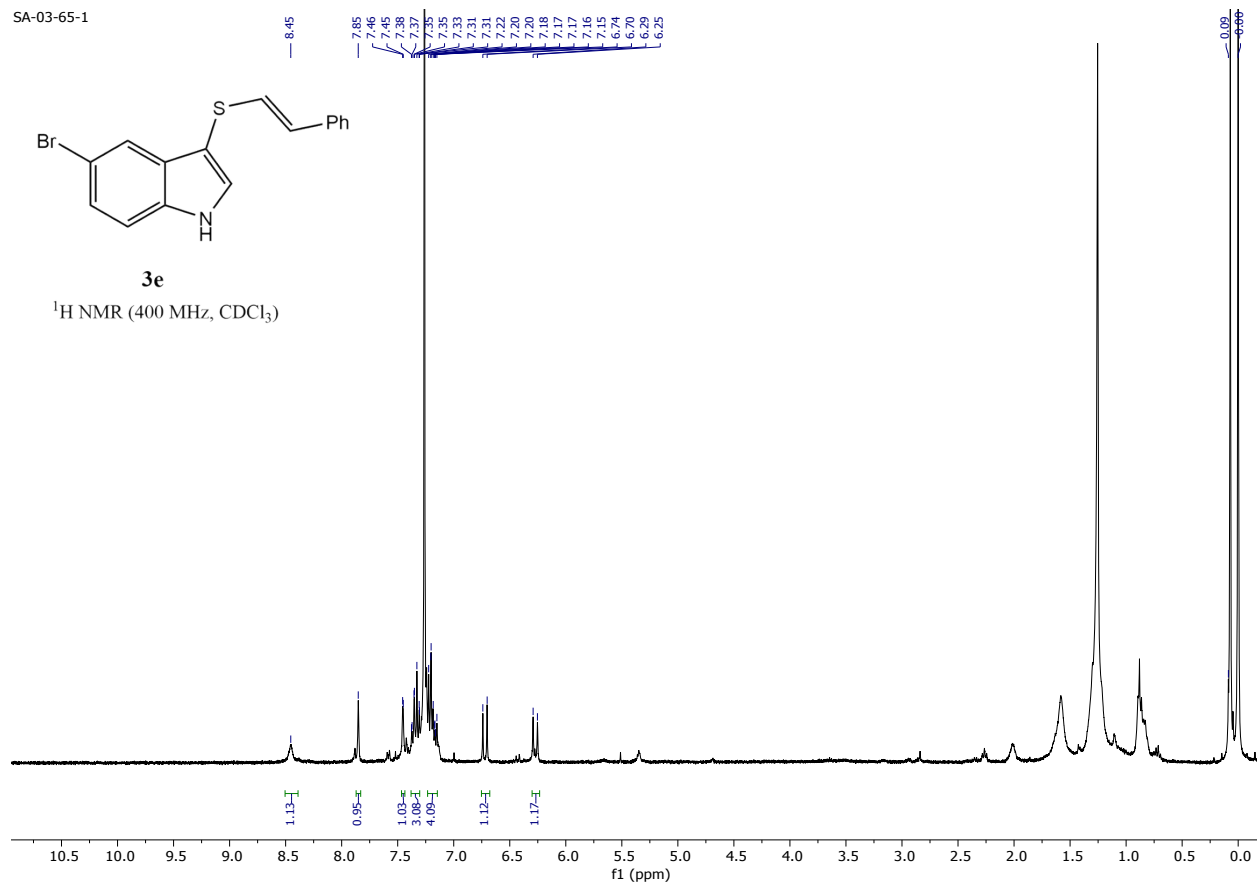

Fig. 9  $^1\text{H NMR}$  Spectrum of (*E*)-5-bromo-3-(styrylthio)-1*H*-indole **3e**

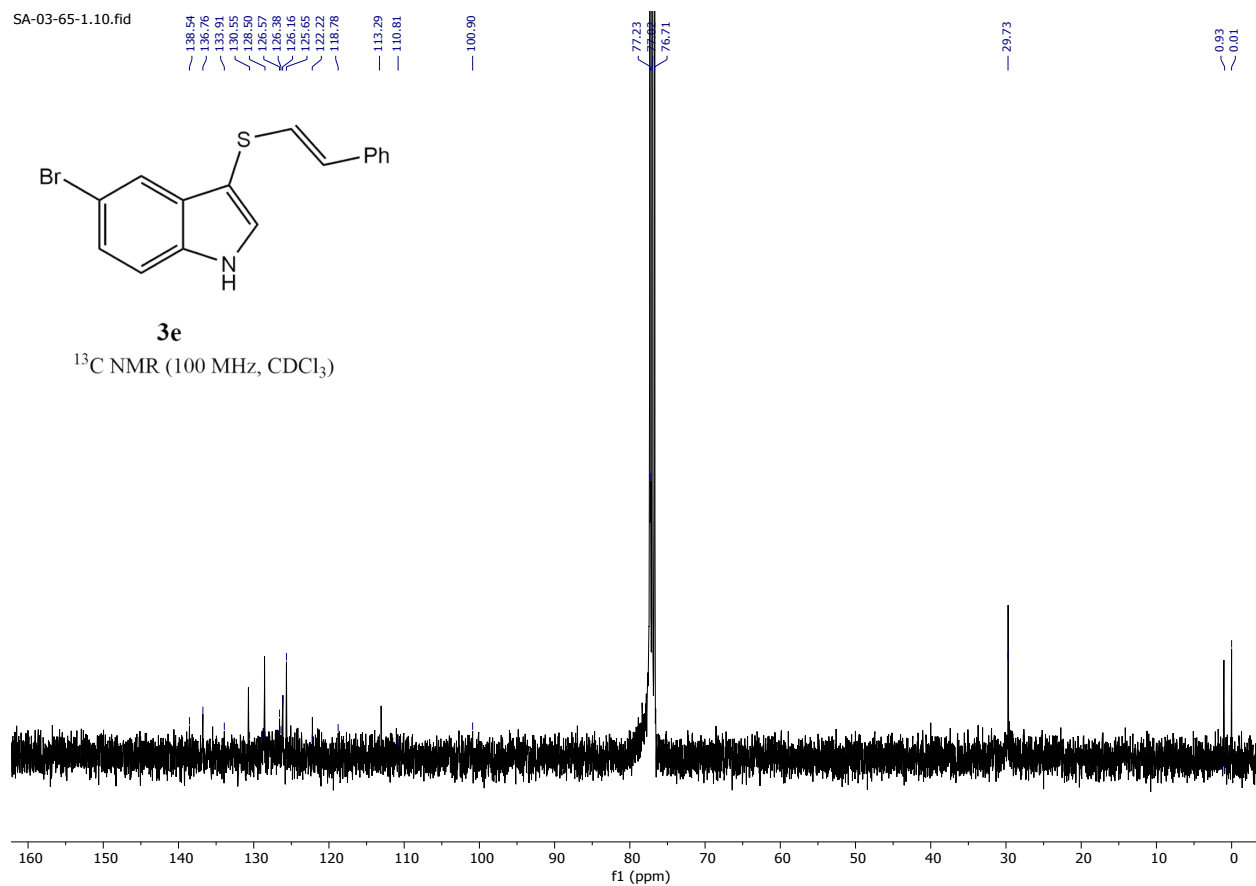

Fig. 10  $^{13}\text{C}$  NMR Spectrum of (*E*)-5-bromo-3-(styrylthio)-1*H*-indole **3e**

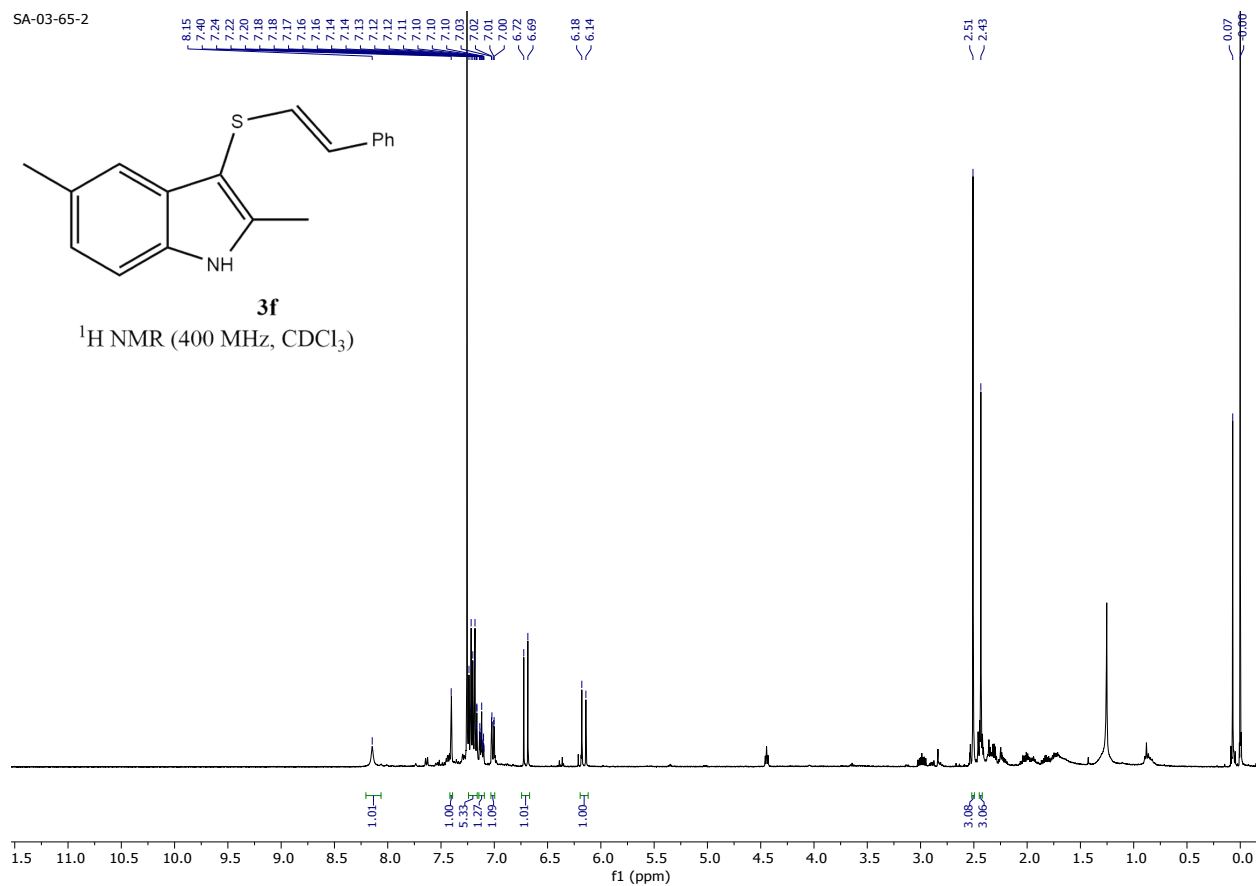

Fig. 11  $^1\text{H NMR}$  Spectrum of (*E*)-2,5-dimethyl-3-(styrylthio)-1*H*-indole **3f**

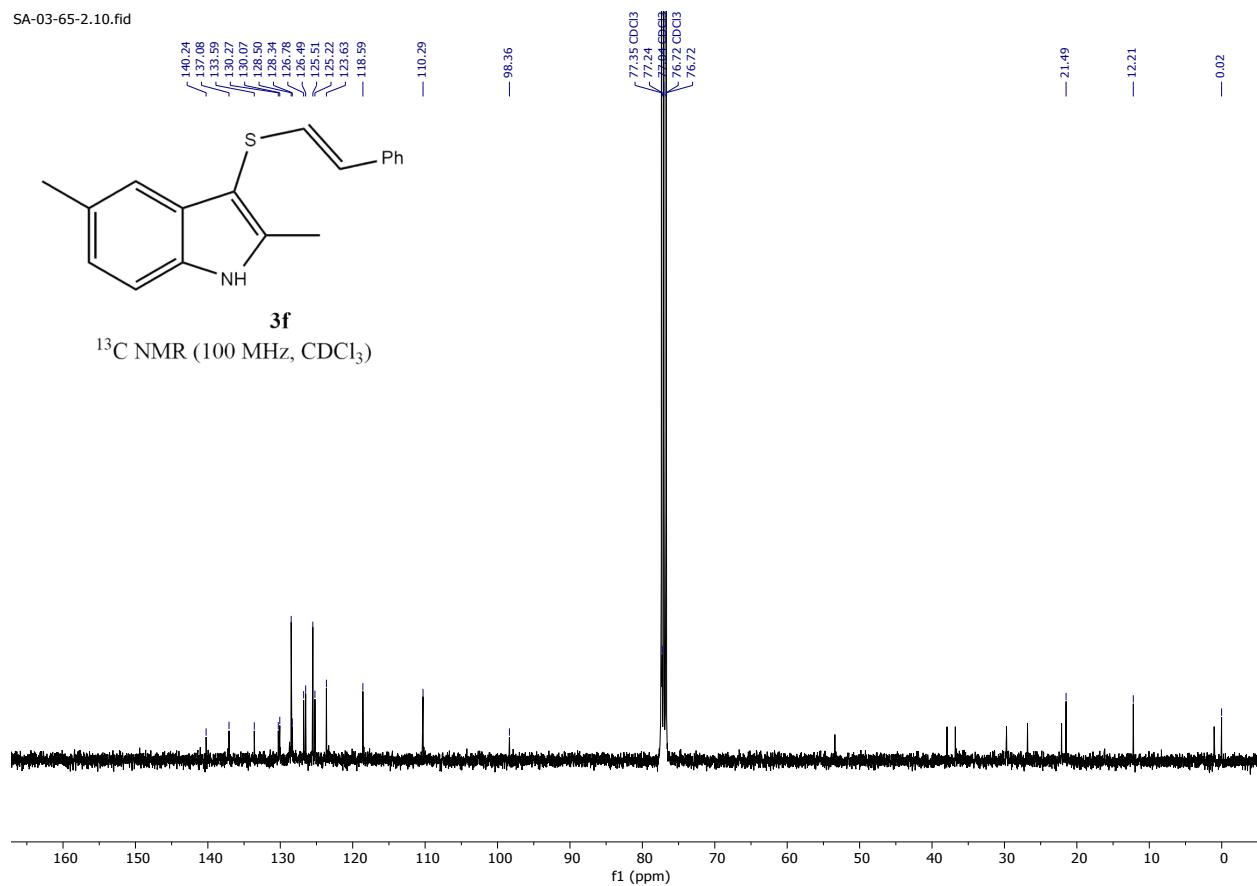

Fig. 12  $^{13}\text{C}$  NMR Spectrum of (*E*)-2,5-dimethyl-3-(styrylthio)-1*H*-indole **3f**

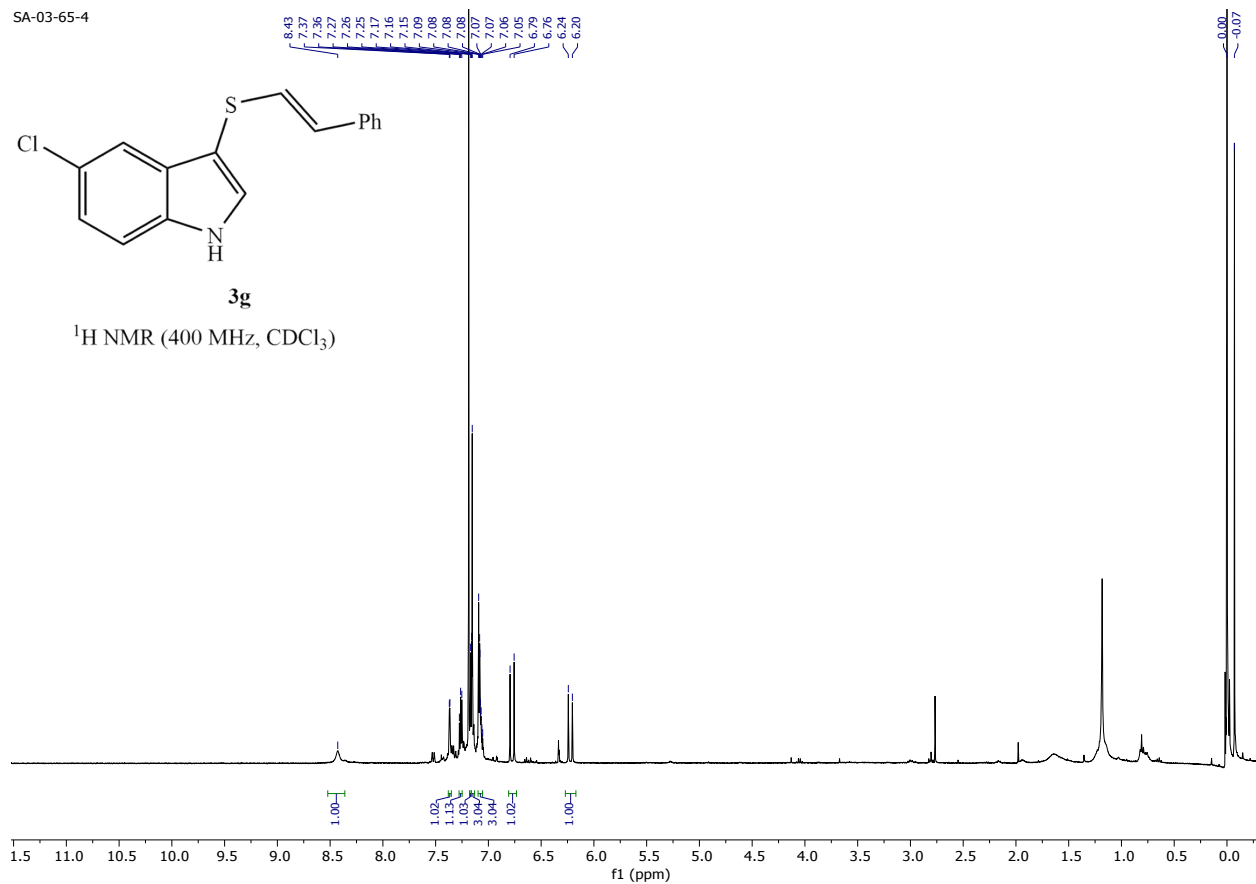

Fig. 13  $^1\text{H NMR}$  Spectrum of (*E*)-5-chloro-3-(styrylthio)-1*H*-indole **3g**

SA-03-65-4.10.fid

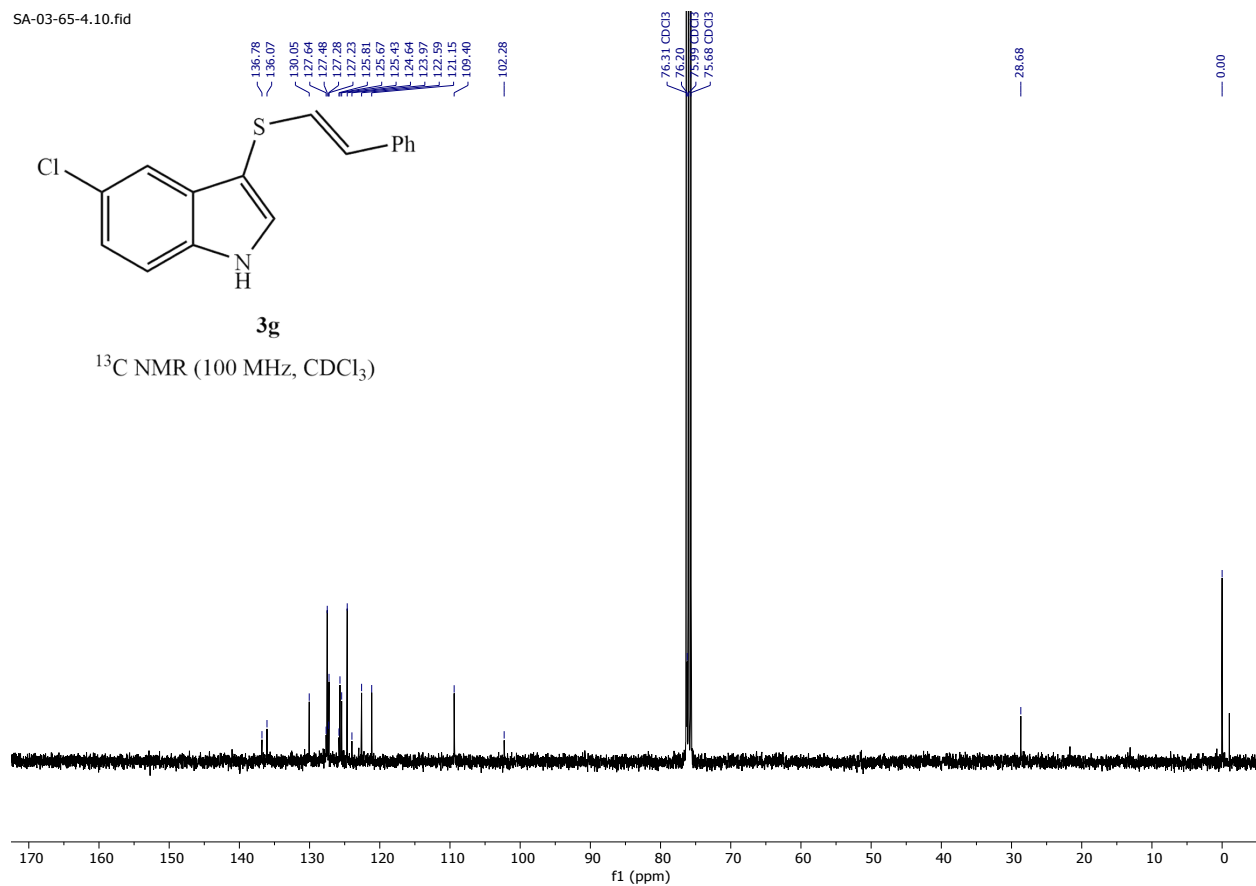

Fig. 14  $^{13}\text{C}$  NMR Spectrum of (*E*)-5-chloro-3-(styrylthio)-1*H*-indole **3g**

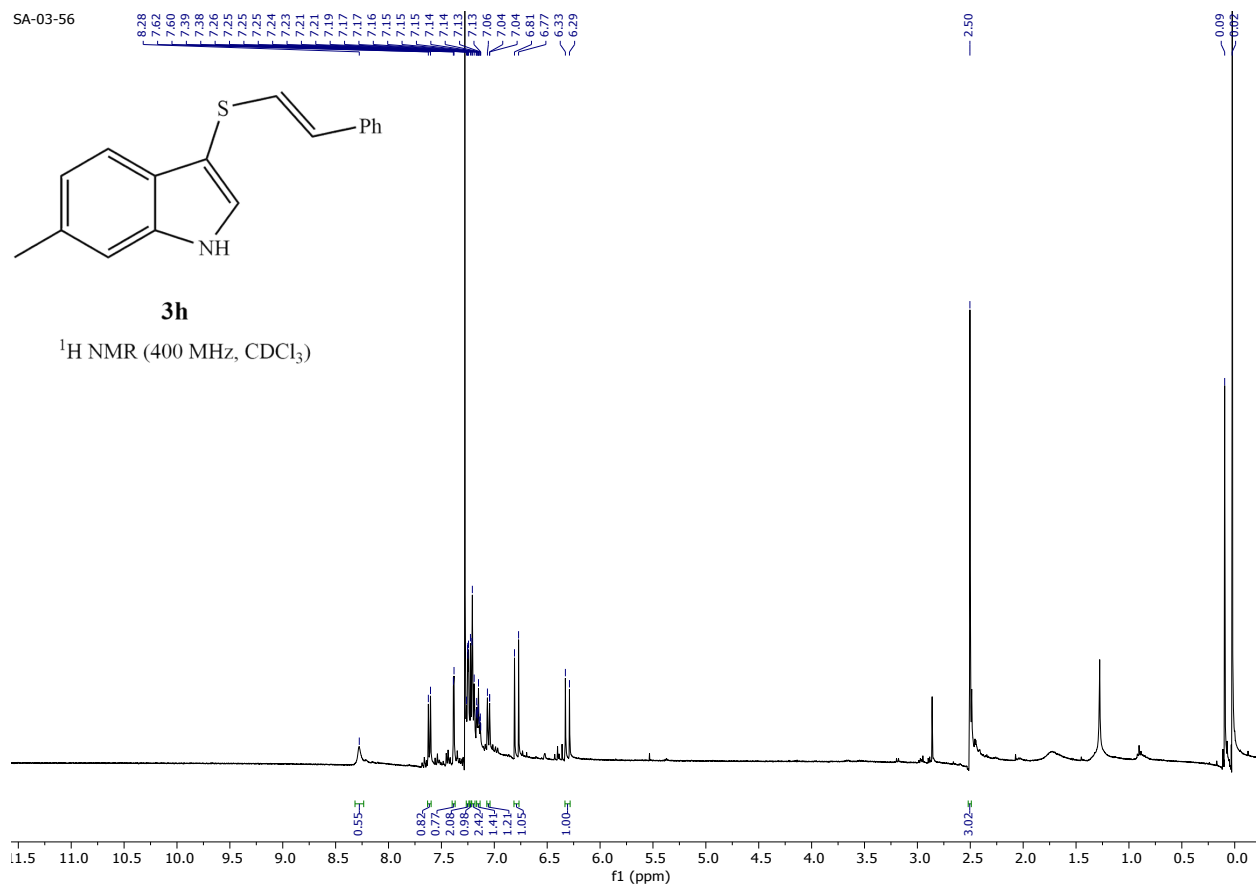

Fig. 15 <sup>1</sup>H NMR Spectrum of (*E*)-6-methyl-3-(styrylthio)-1*H*-indole **3h**



SA-03-56.10.fid

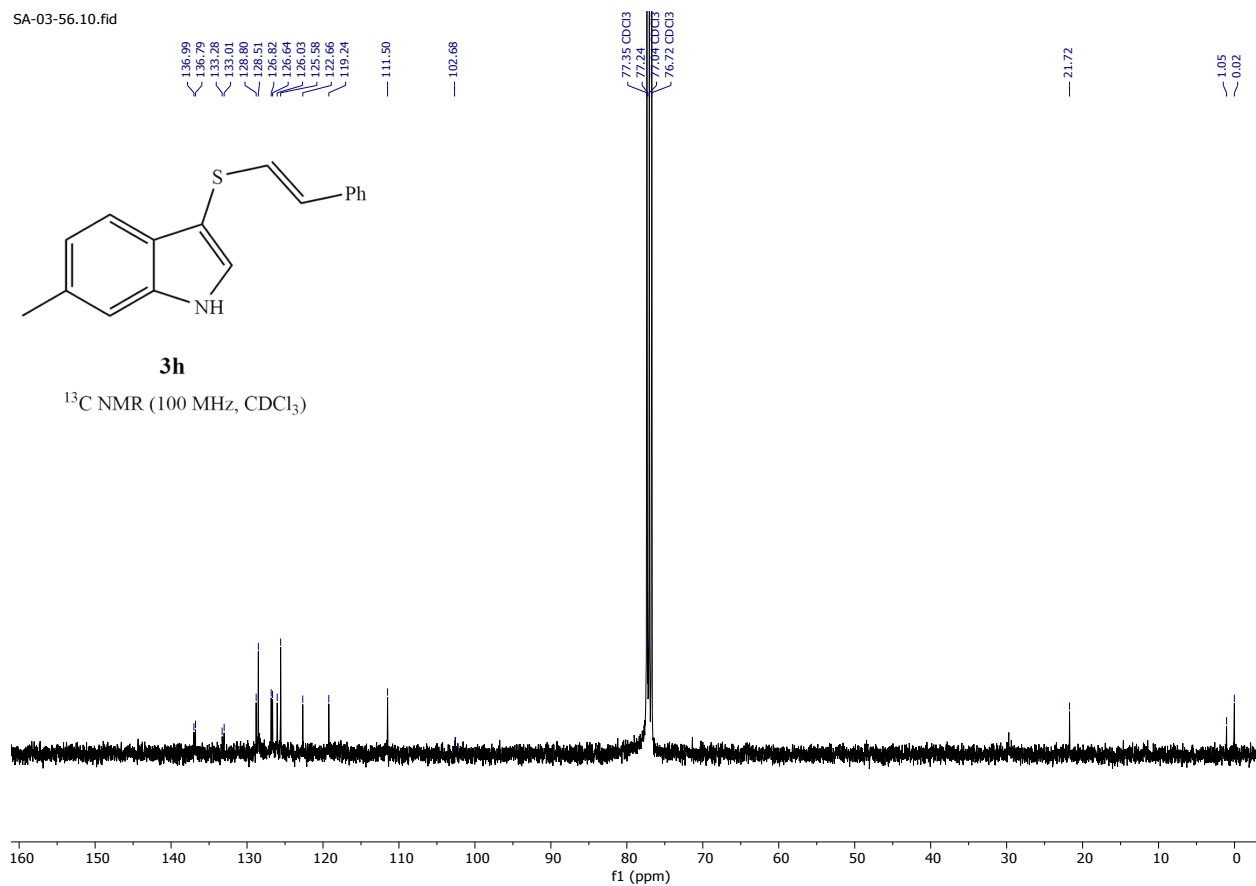

Fig. 16 <sup>13</sup>C NMR Spectrum of (*E*)-6-methyl-3-(styrylthio)-1*H*-indole **3h**

SA-03-55

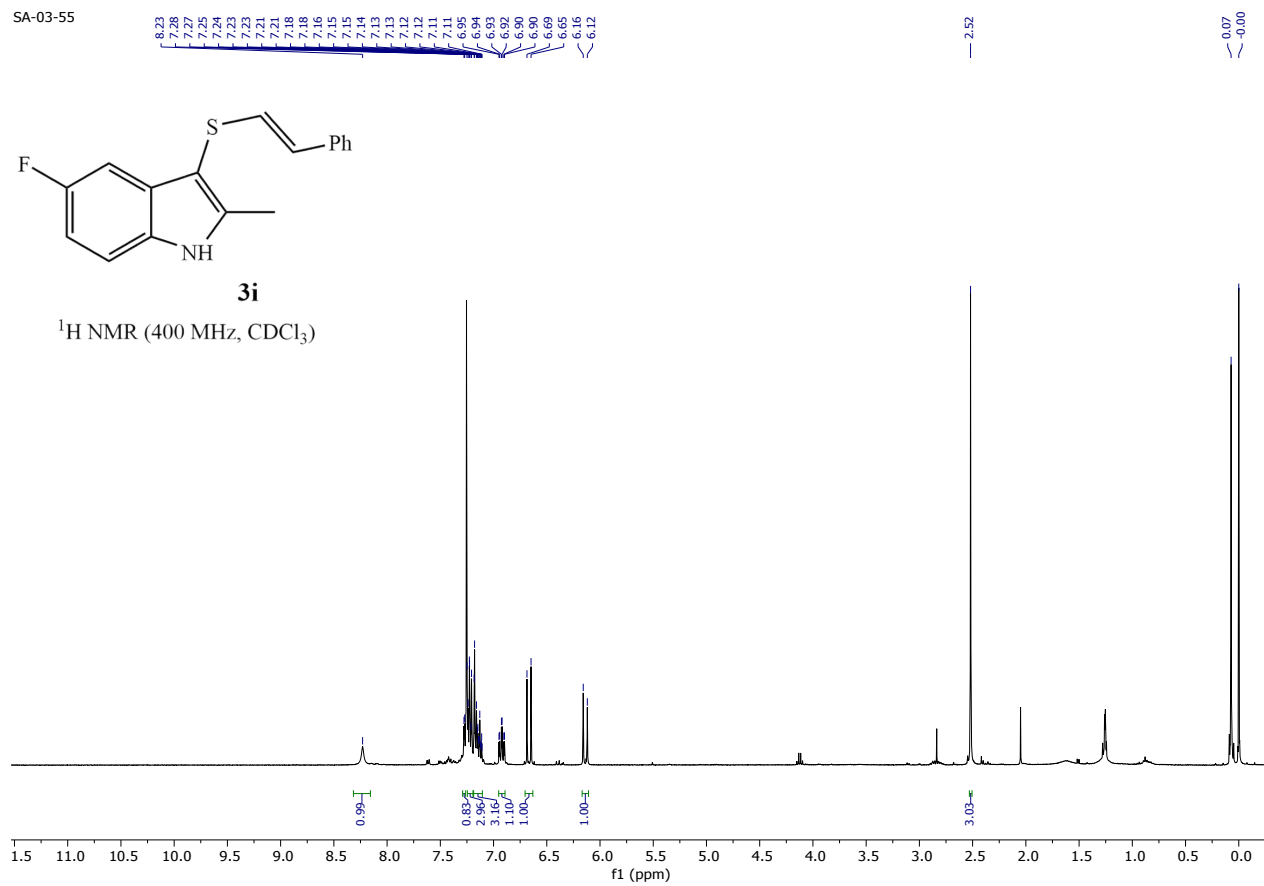

Fig. 17 <sup>1</sup>H NMR Spectrum of (*E*)-5-Fluoro-2-methyl-3-(styrylthio)-1*H*-indole **3i**

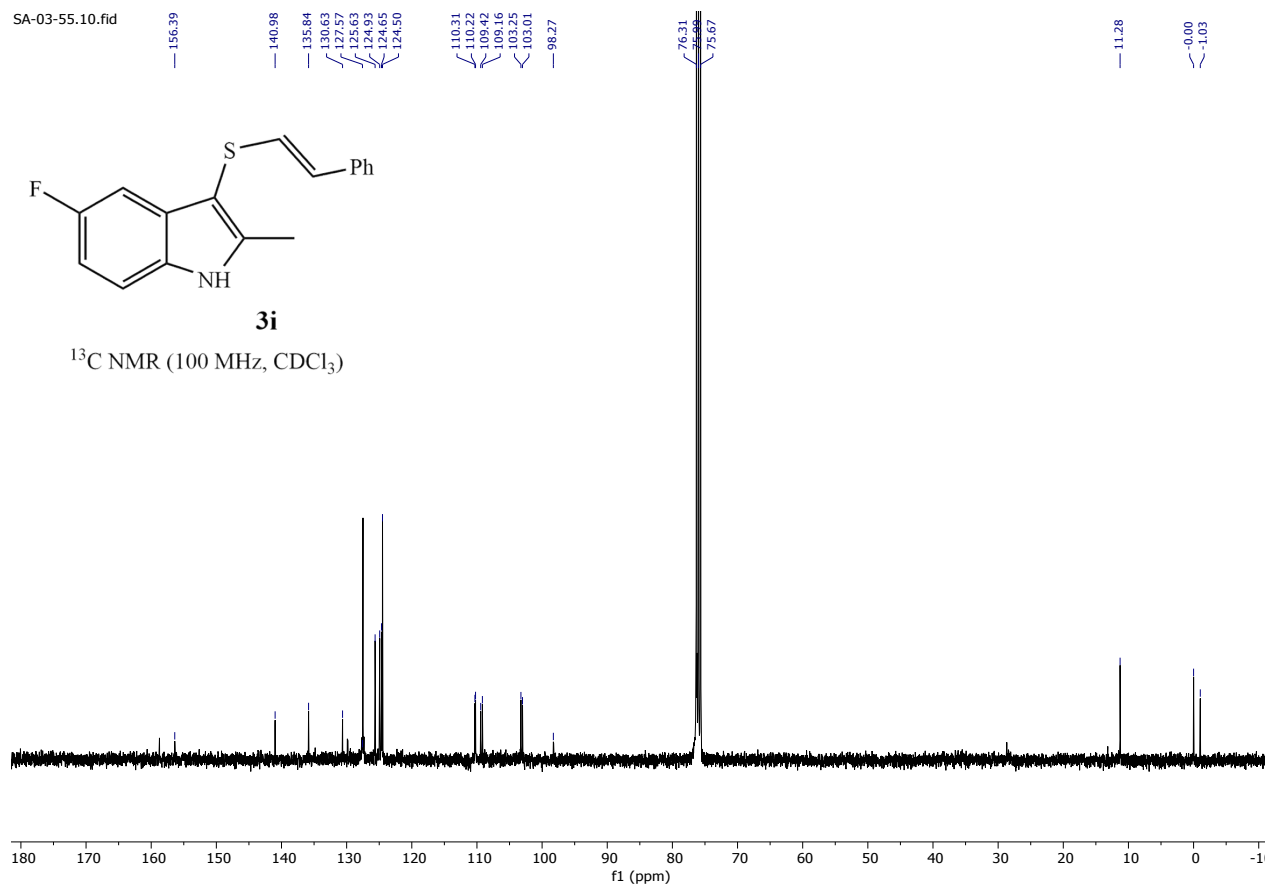

Fig. 18  $^{13}\text{C}$  NMR Spectrum of (*E*)-5-Fluoro-2-methyl-3-(styrylthio)-1*H*-indole **3i**

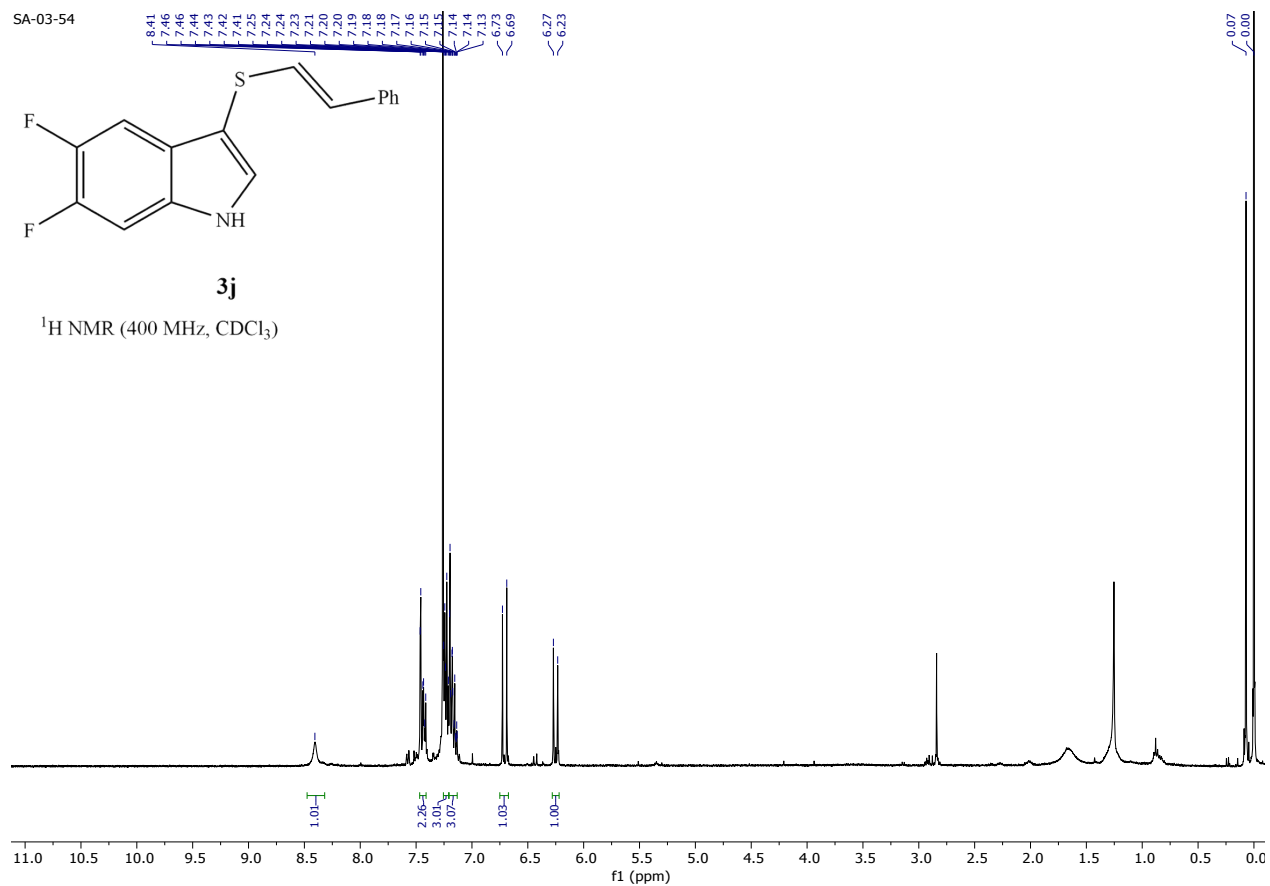

Fig. 1 <sup>1</sup>H NMR Spectrum of (*E*)-5,6-Difluoro-3-(styrylthio)-1*H*-indole **3j**

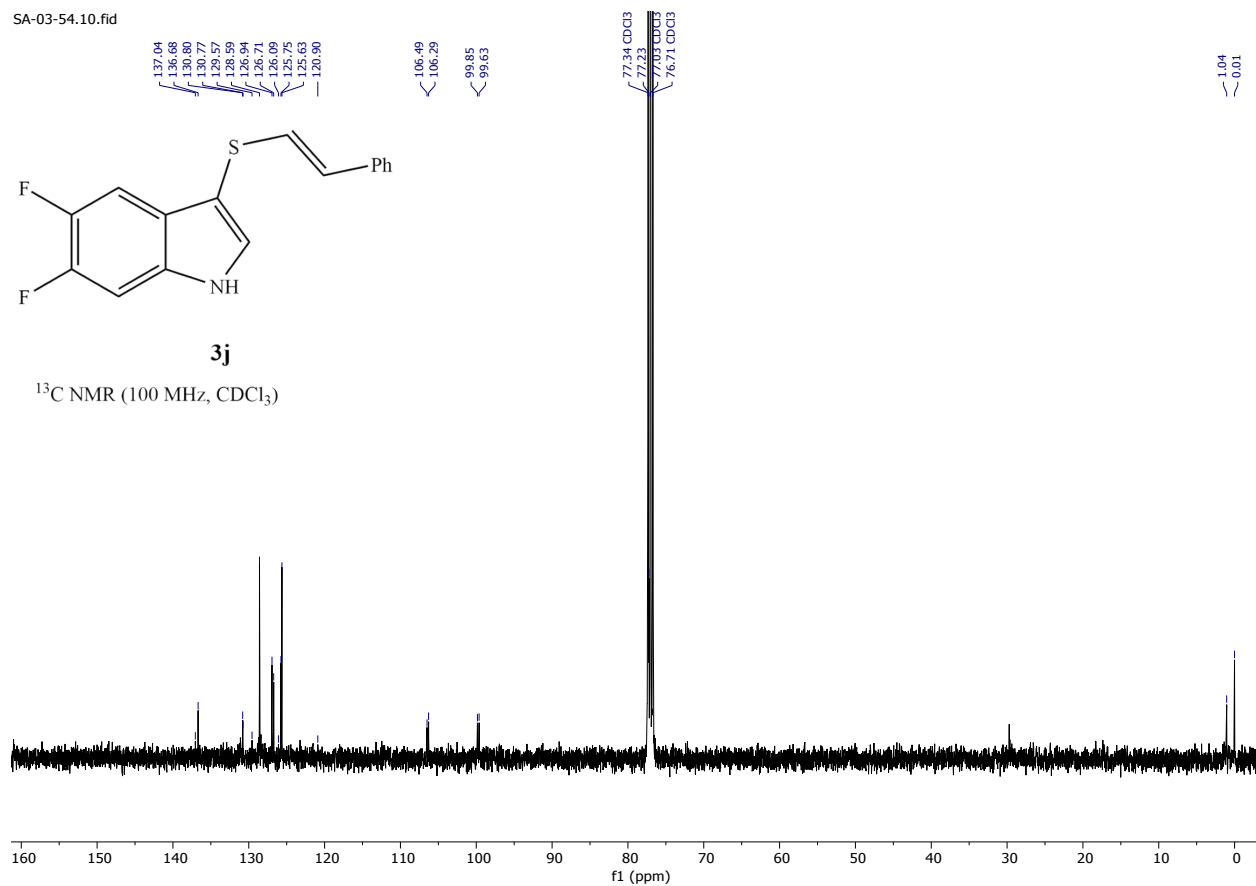

Fig. 20  $^{13}\text{C}$  NMR Spectrum of (*E*)-5,6-Difluoro-3-(styrylthio)-1*H*-indole **3j**

SA-03-65-5

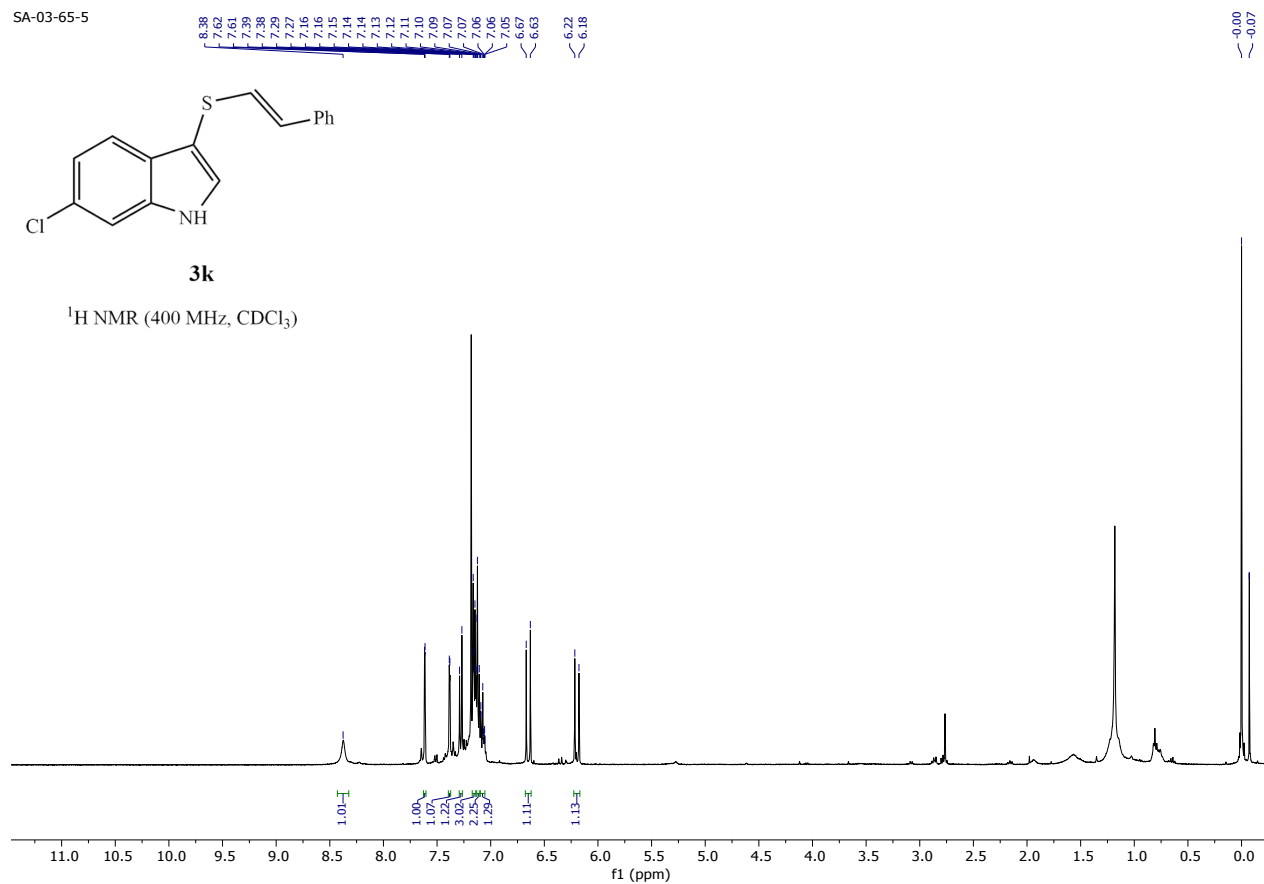

Fig. 21 <sup>1</sup>H NMR Spectrum of (*E*)-6-Chloro-3-(styrylthio)-1*H*-indole **3k**

SA-03-65-5.10.fid

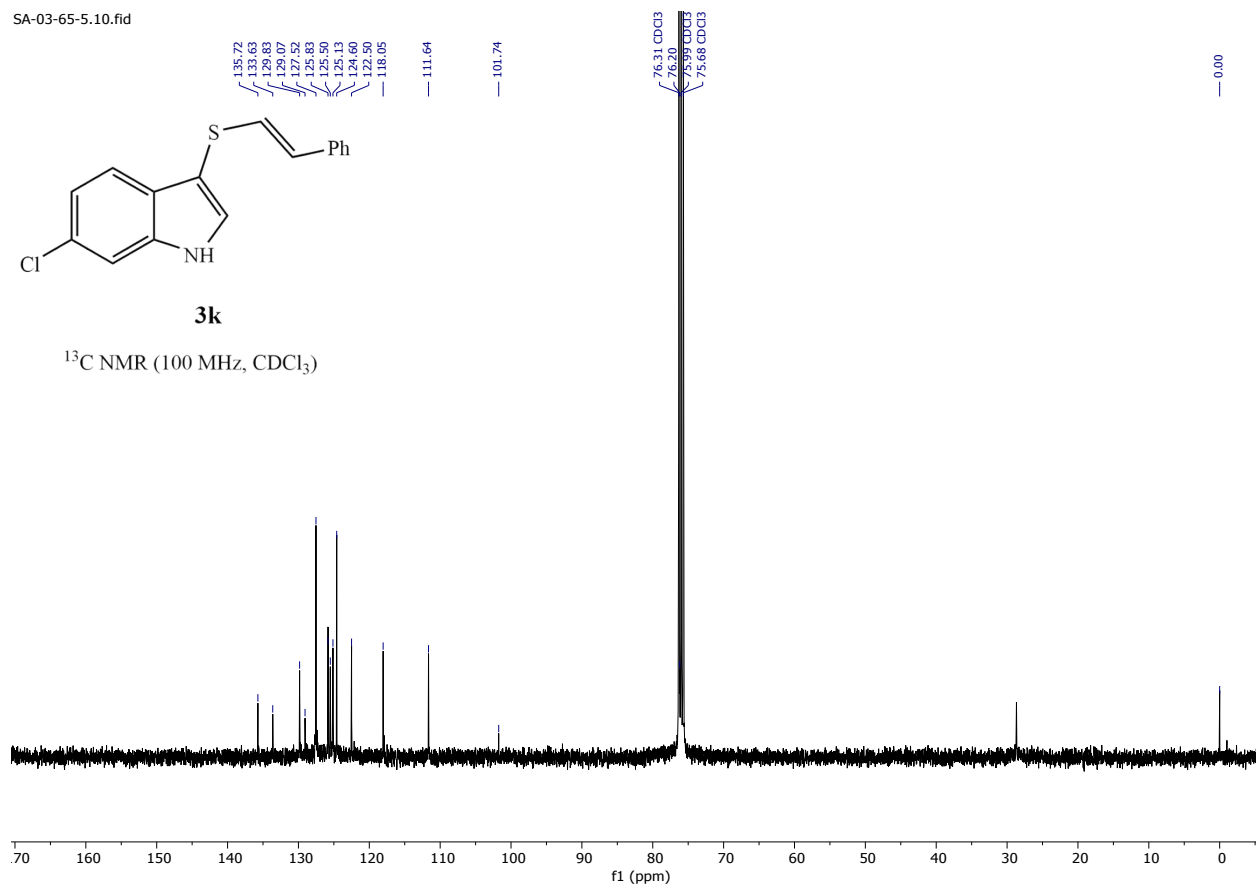

Fig. 22  $^{13}\text{C}$  NMR Spectrum of (*E*)-6-Chloro-3-(styrylthio)-1*H*-indole **3k**

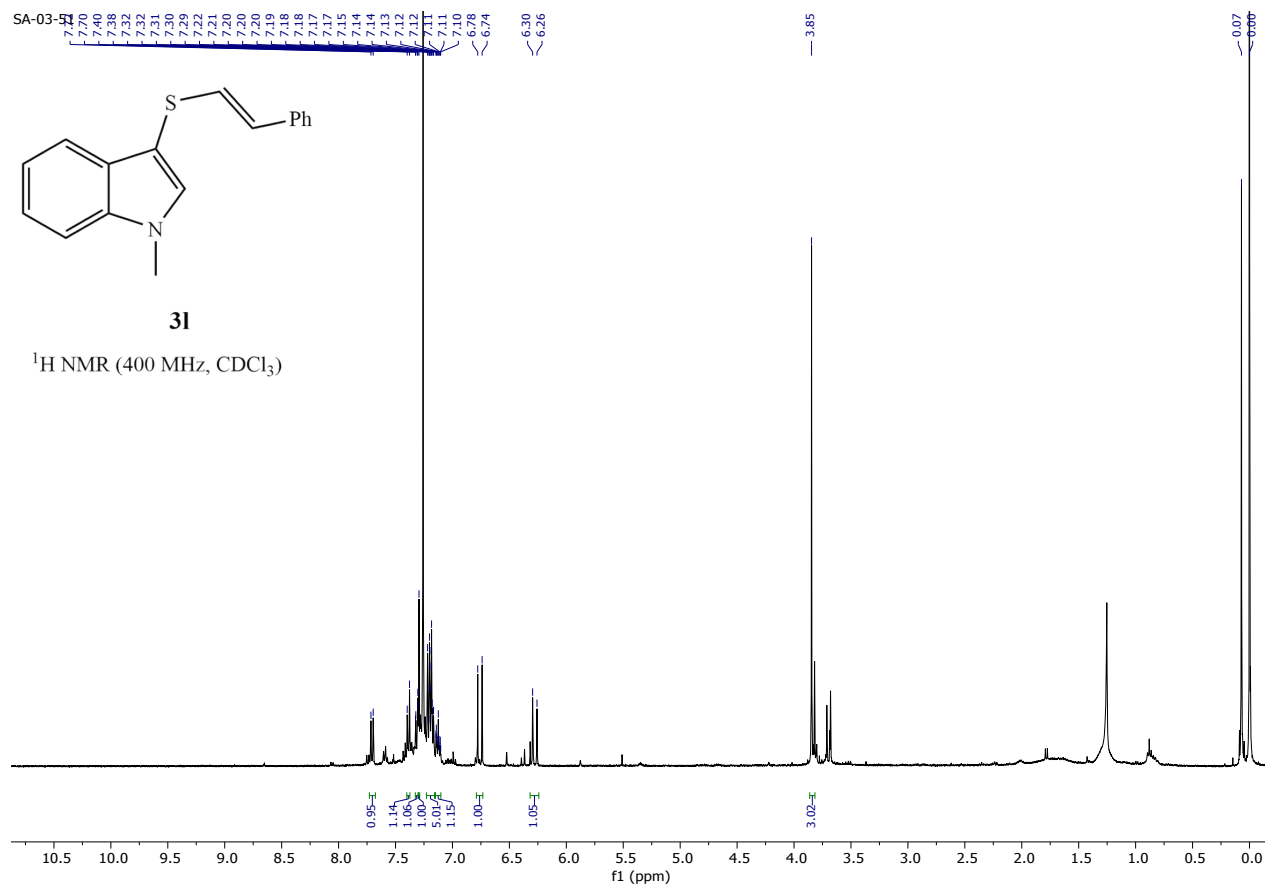

Fig. 23 <sup>1</sup>H NMR Spectrum of (*E*)-1-Methyl-3-(styrylthio)-1*H*-indole **31**



SA-03-51.10.fid

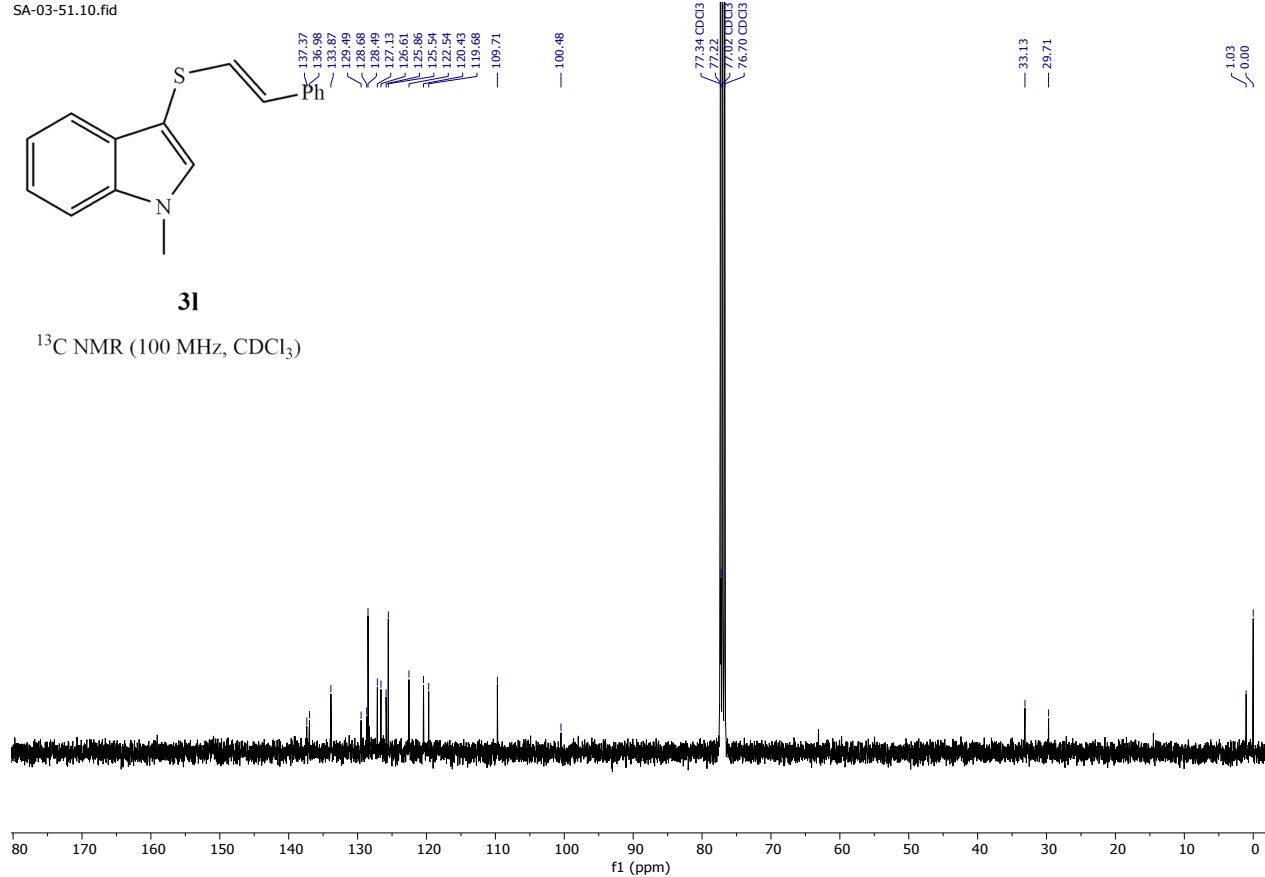

Fig. 24  $^{13}\text{C}$  NMR Spectrum of (*E*)-1-Methyl-3-(styrylthio)-1*H*-indole **31**

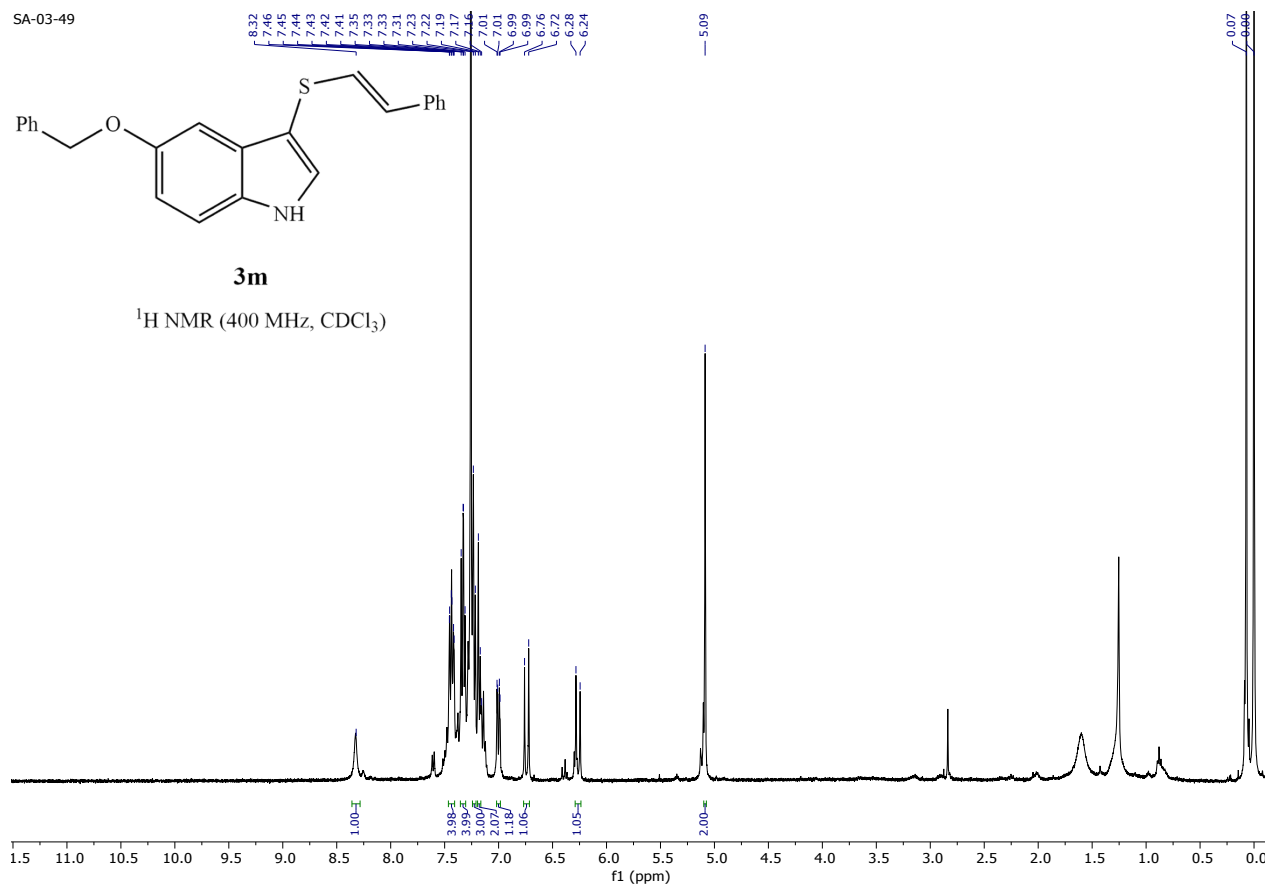

Fig. 25  $^1\text{H NMR}$  Spectrum of (*E*)-5-(Benzyloxy)-3-(styrylthio)-1*H*-indole **3m**

SA-03-49.20.fid

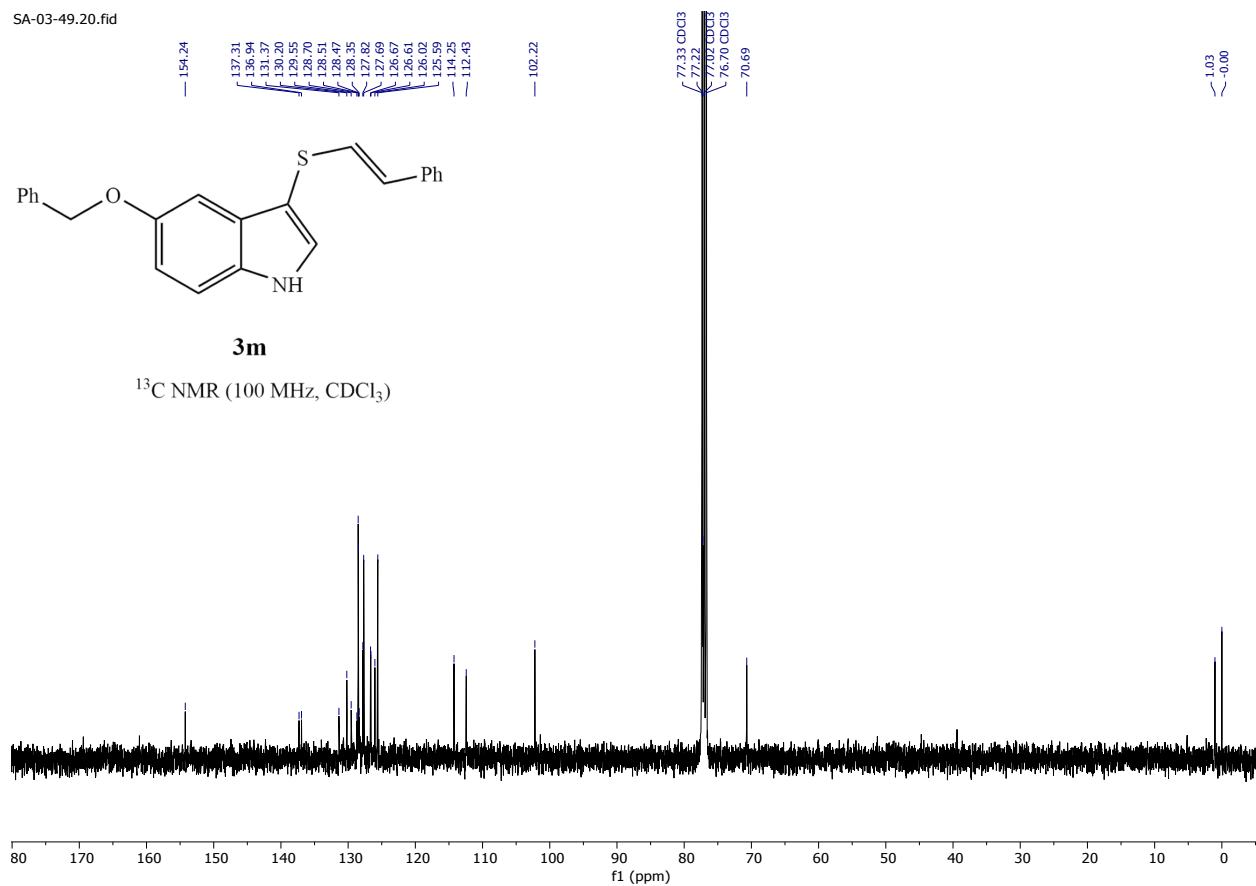

Fig. 26  $^{13}\text{C}$  NMR Spectrum of (*E*)-5-(Benzyloxy)-3-(styrylthio)-1*H*-indole **3m**

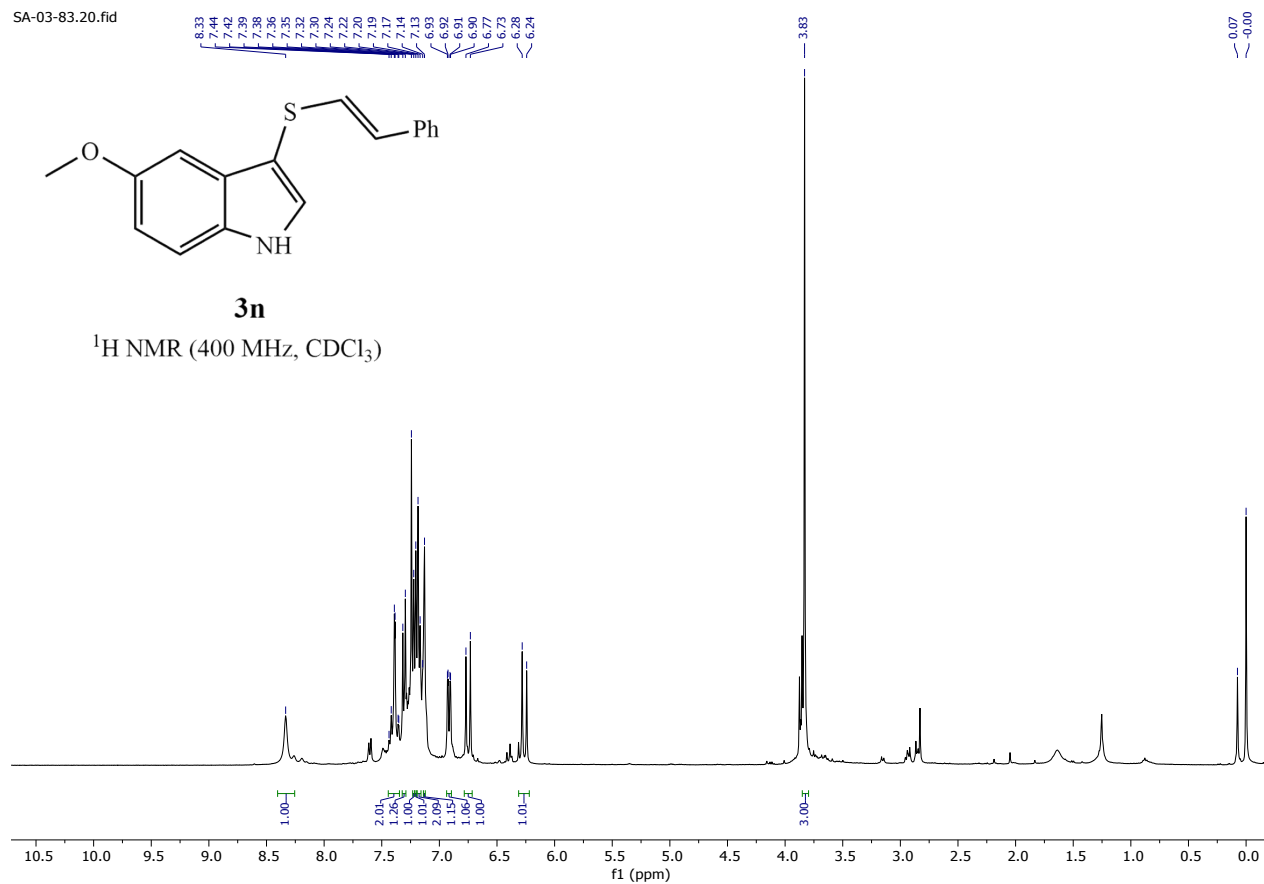

Fig. 27  $^1\text{H NMR}$  Spectrum of (*E*)-5-Methoxy-3-(styrylthio)-1*H*-indole **3n**

sa03-83

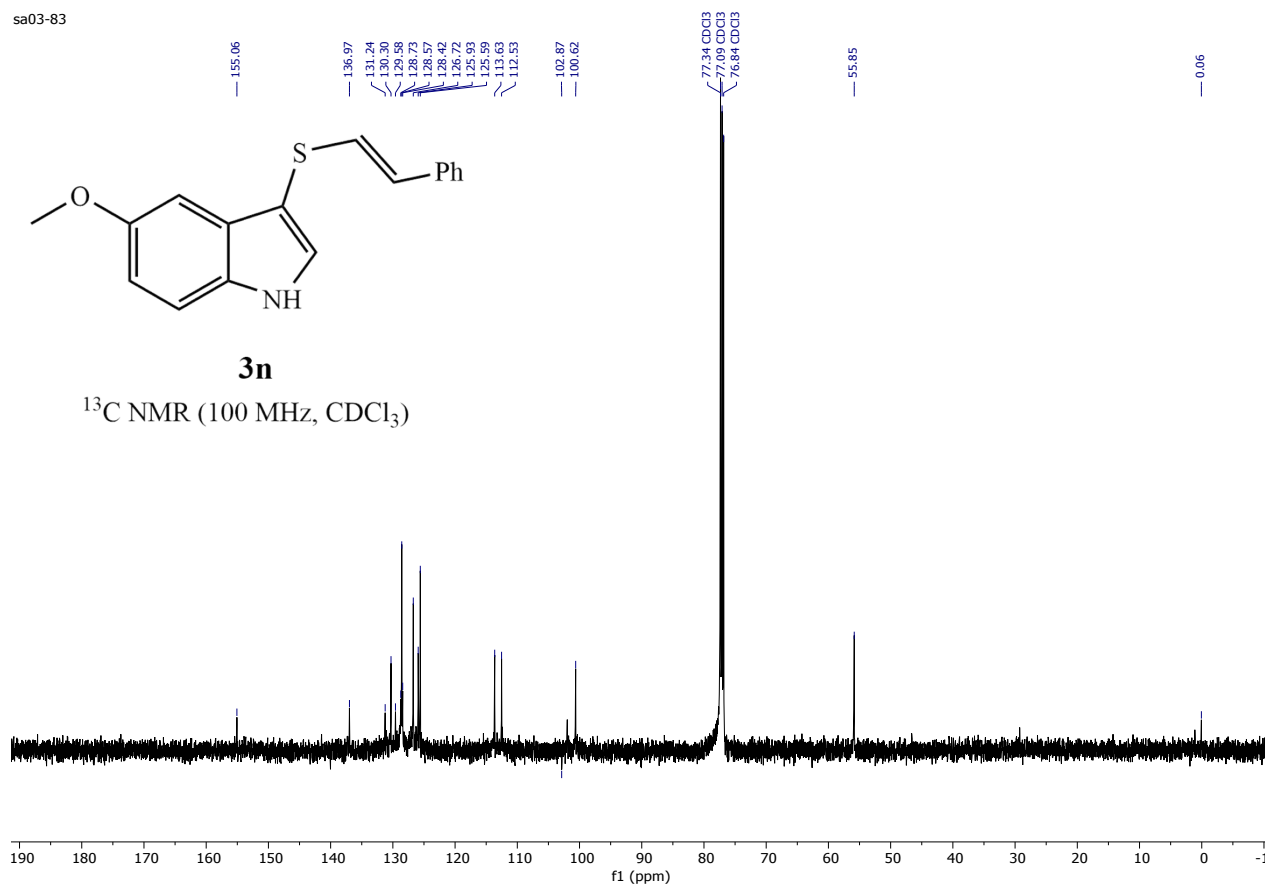

Fig. 28 <sup>13</sup>C NMR Spectrum of (*E*)-5-Methoxy-3-(styrylthio)-1*H*-indole **3n**

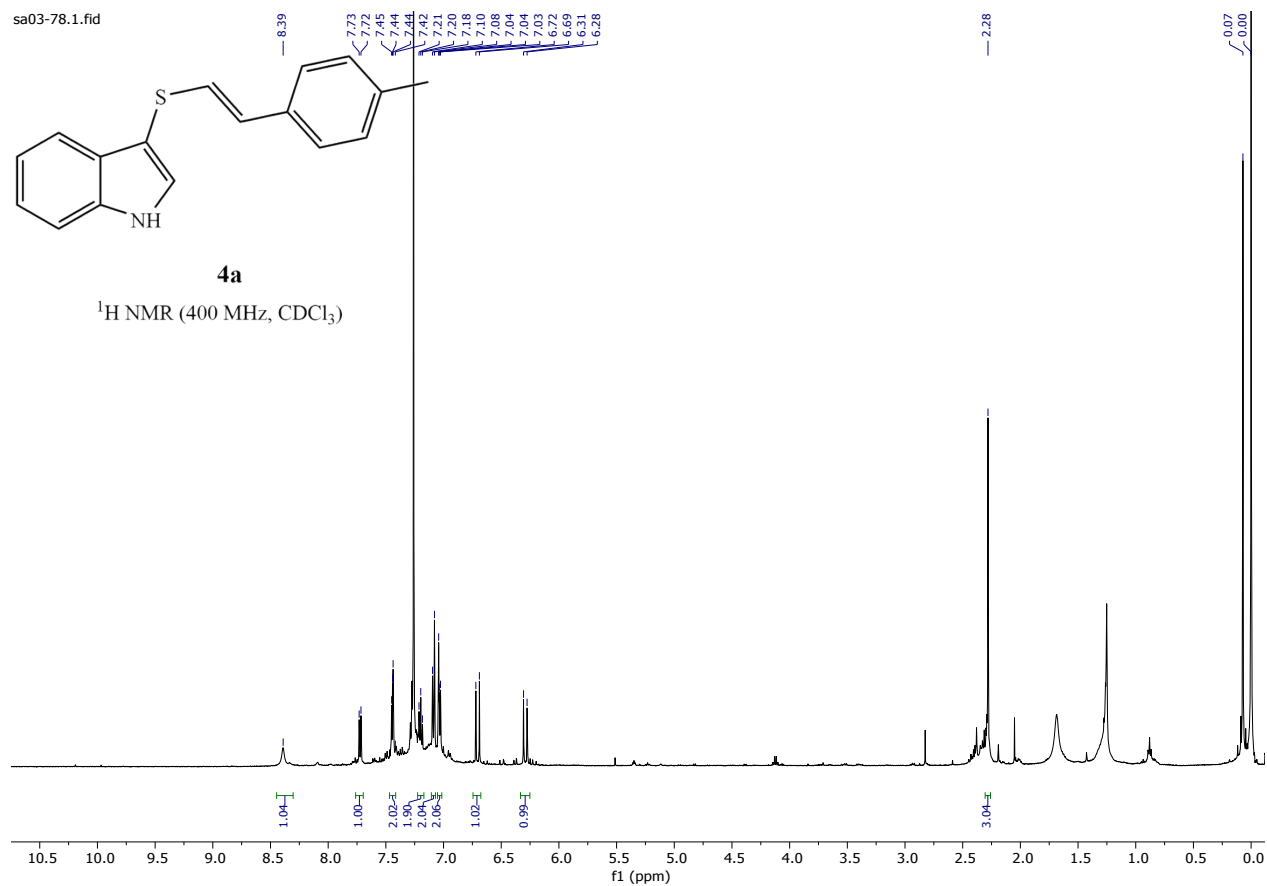

Fig. 29 <sup>1</sup>H NMR Spectrum of (*E*)-3-((4-Methylstyryl)thio)-1*H*-indole **4a**

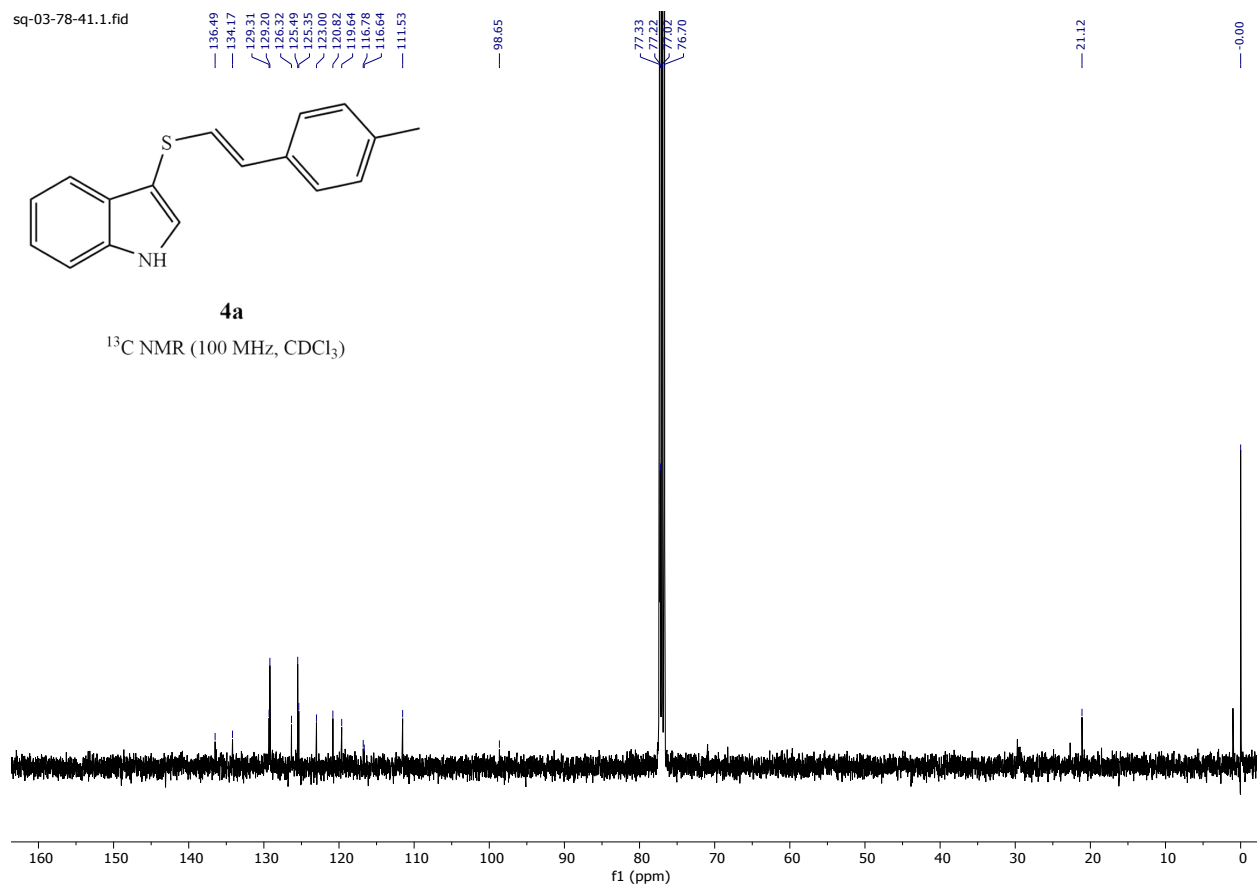

Fig. 30 <sup>13</sup>C NMR Spectrum of (*E*)-3-((4-Methylstyryl)thio)-1*H*-indole **4a**

sa03-79.1.fid

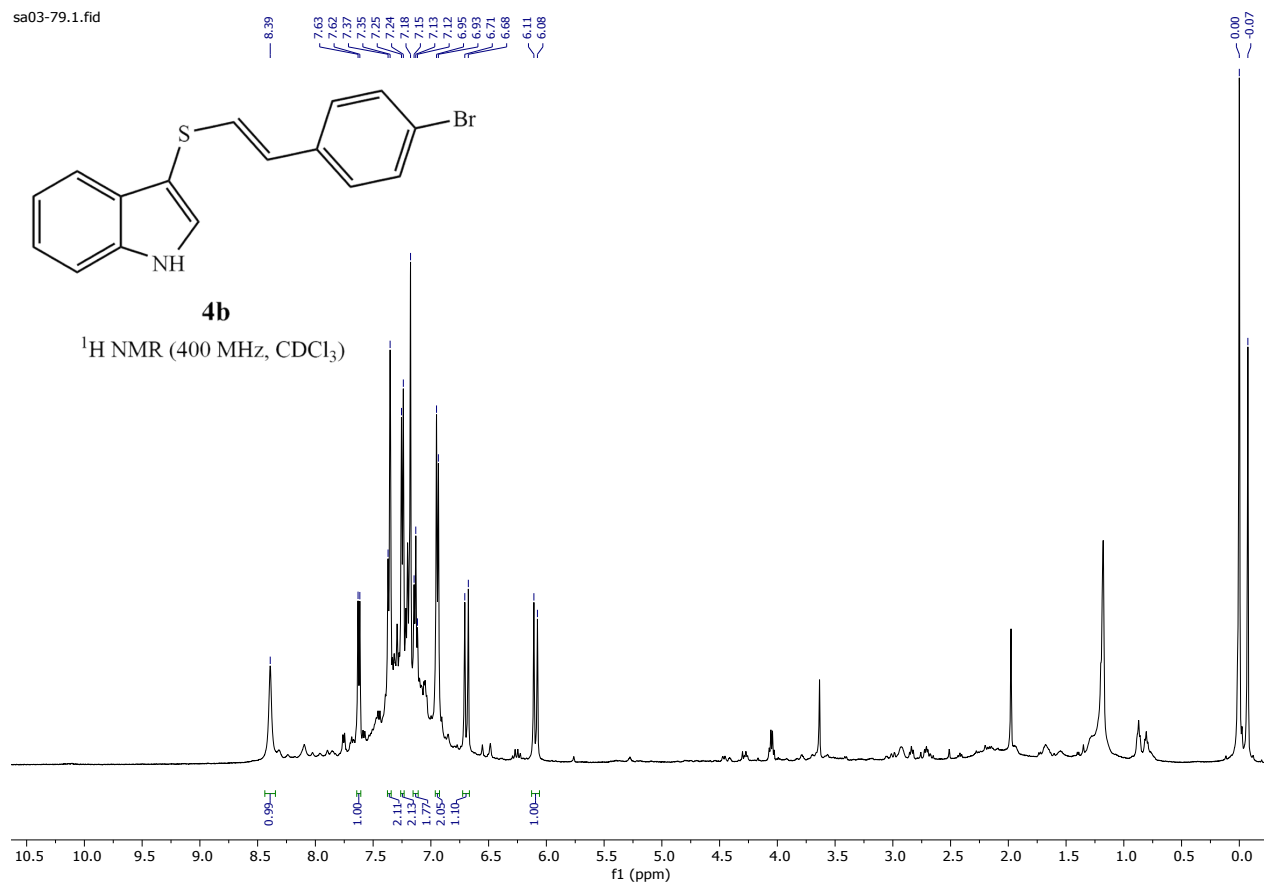

Fig. 31 <sup>1</sup>H NMR Spectrum of (*E*)-3-((4-Bromostyryl)thio)-1*H*-indole **4b**



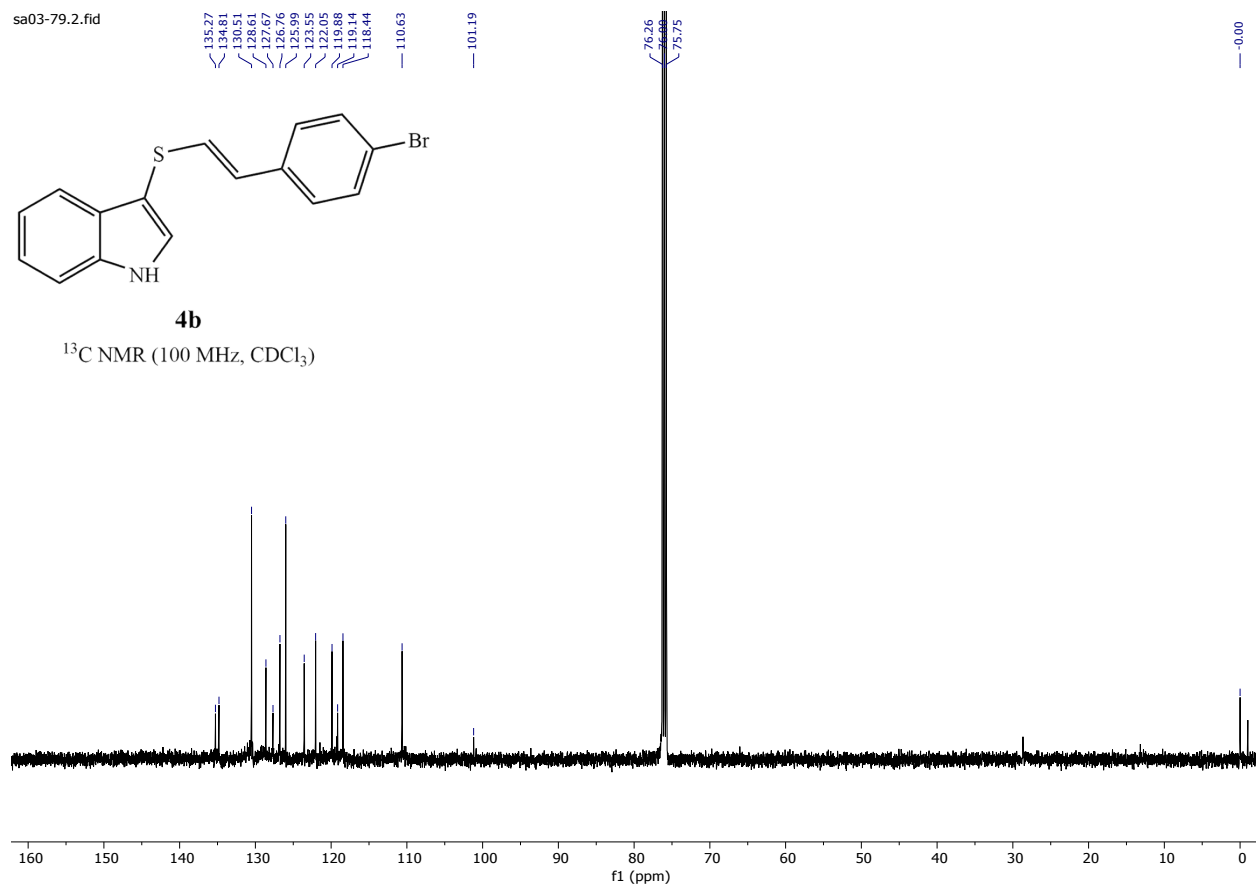

Fig. 32  $^{13}\text{C}$  NMR Spectrum of (*E*)-3-((4-Bromostyryl)thio)-1*H*-indole **4b**

SA-03-98.10.fid

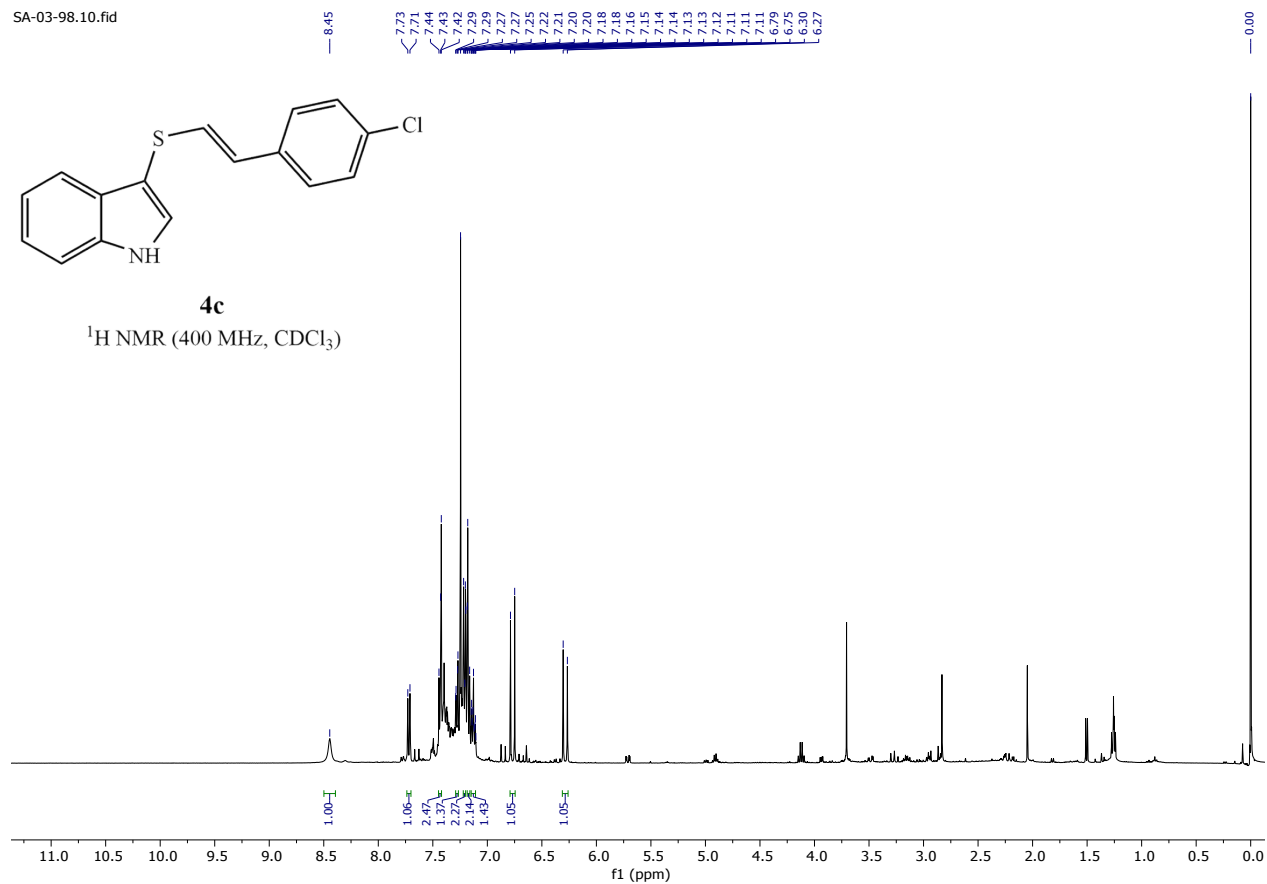

Fig. 33 <sup>1</sup>H NMR Spectrum of (*E*)-3-((4-Chlorostyryl)thio)-1*H*-indole **4c**

SA-03-79.10.fid

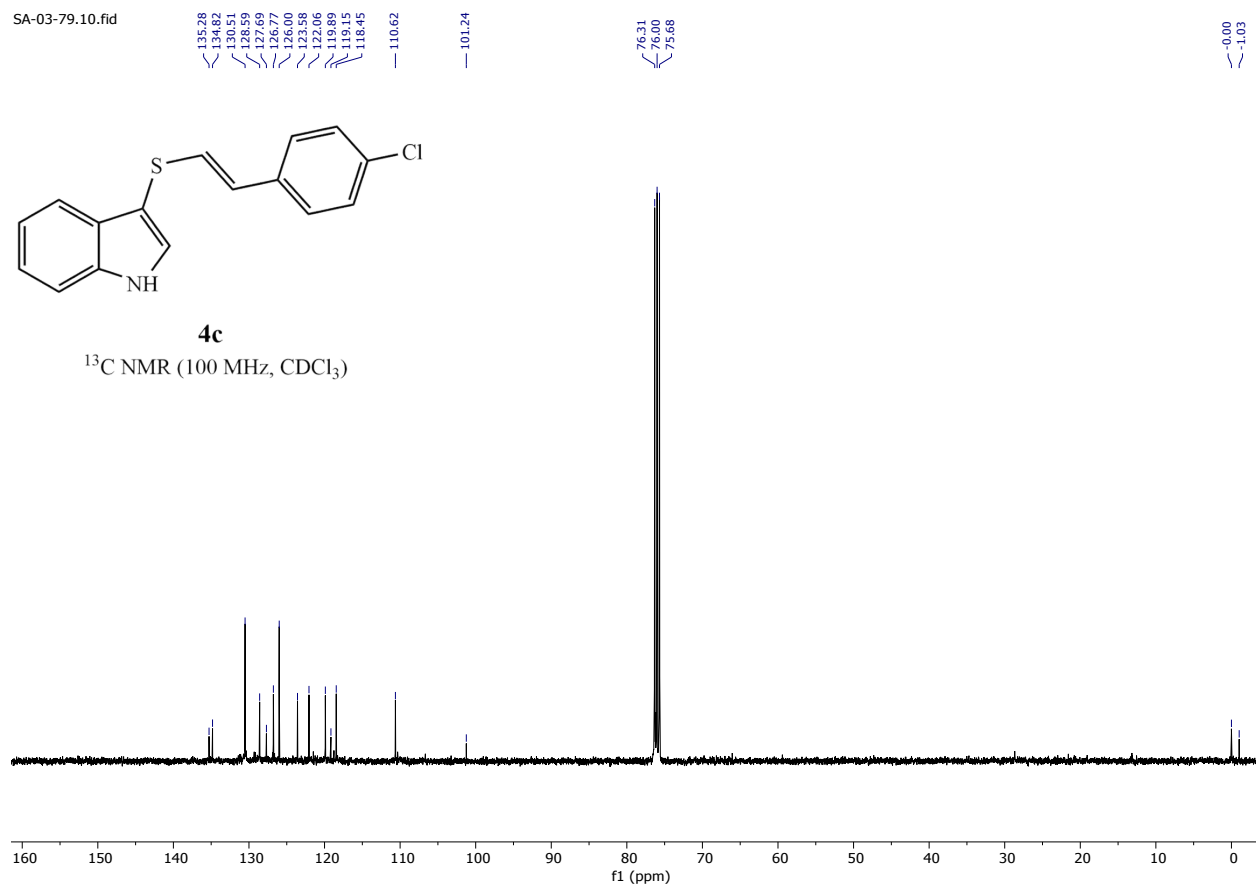

Fig. 34 <sup>13</sup>C NMR Spectrum of (*E*)-3-((4-Chlorostyryl)thio)-1*H*-indole **4c**

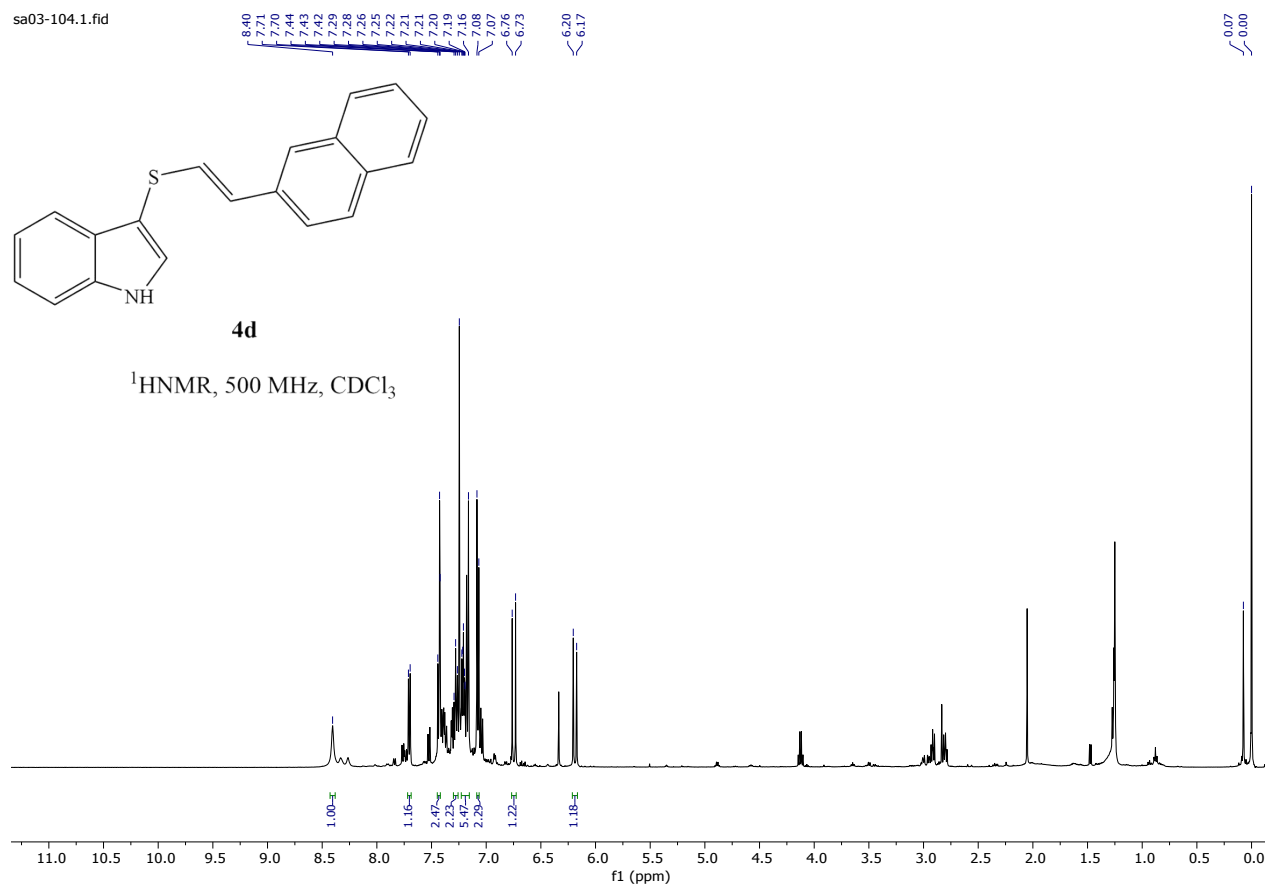

Fig. 35 <sup>1</sup>H NMR Spectrum of (*E*)-3-((2-(Naphthalen-2-yl) vinyl) thio)-1*H*-indole **4d**

20191031EI+sa-03-42\_001#303-338 RT: 1.68-1.86 AV: 36 SB: 1 1.28 NL: 9.67E7  
 T: FTMS + c EI Full ms [50.0000-600.0000]

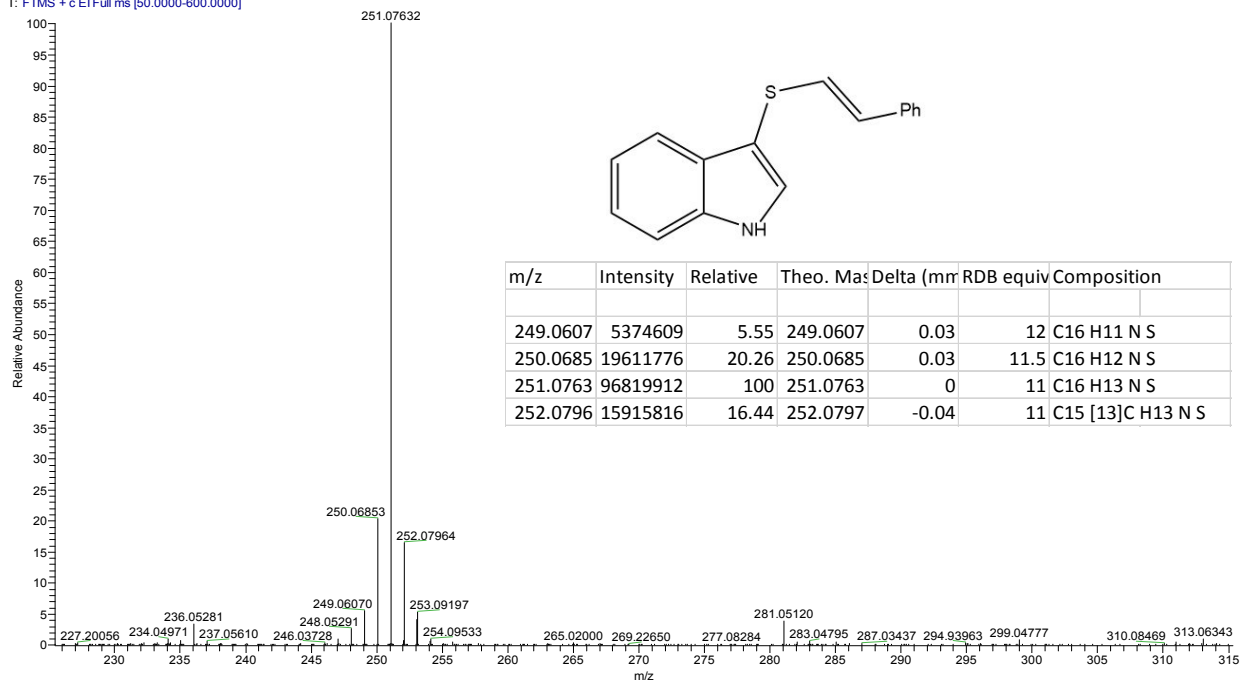

Fig. 36 EIMS of *(E)*-3-(Styrylthio)-1H-indole **3a**

20191120HESI+SA-03-65-1 #15 RT: 0.37 AV: 1 NL: 3.55E6  
T: FTMS + c ESI Full ms [100.00-800.00]

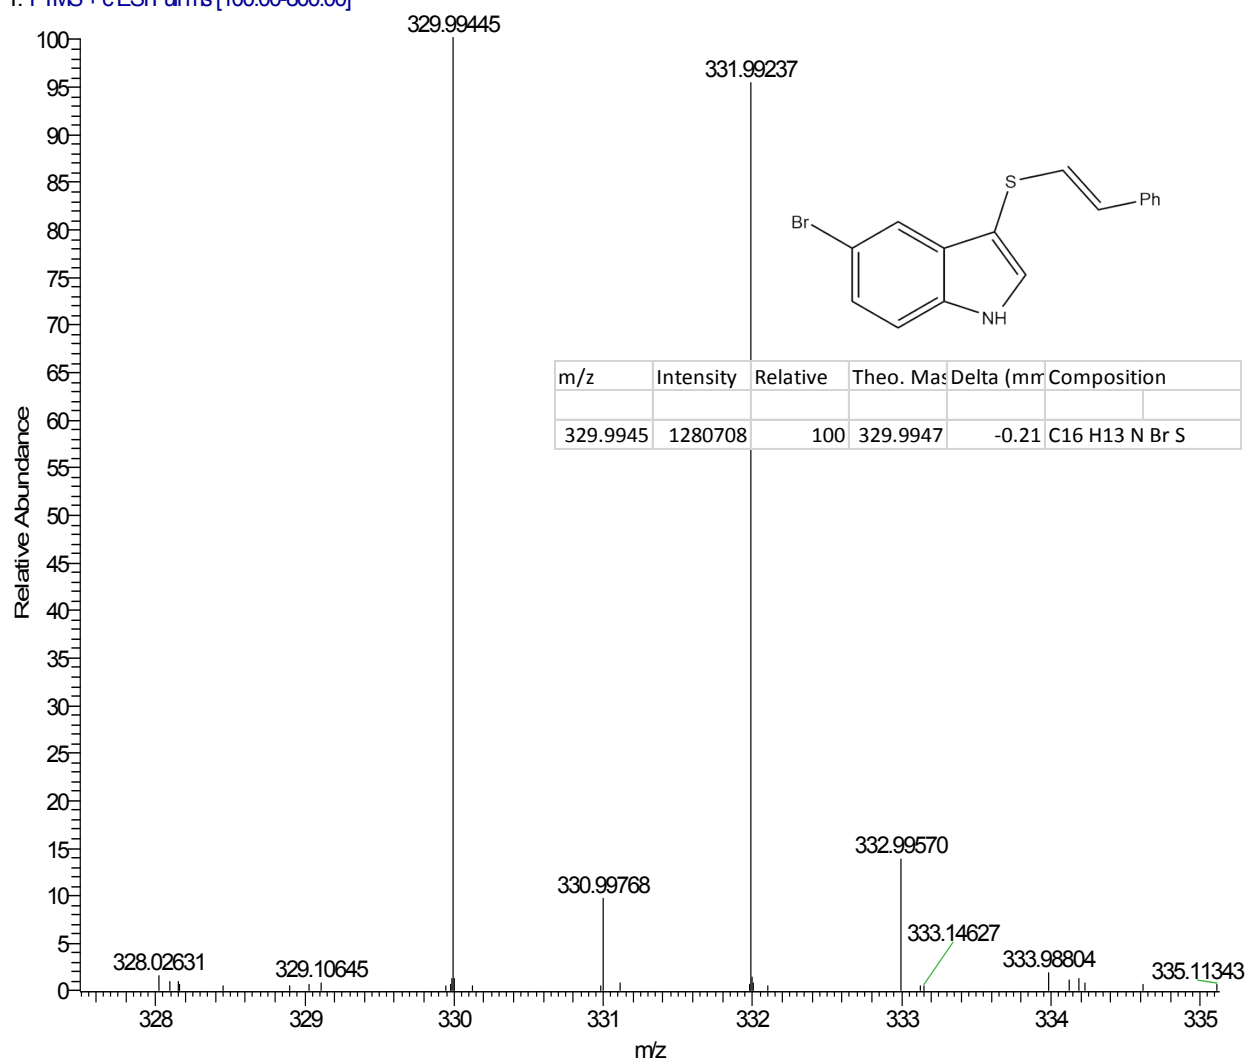

| m/z      | Intensity | Relative | Theo. Mas | Delta (m/z) | Composition    |
|----------|-----------|----------|-----------|-------------|----------------|
| 329.9945 | 1280708   | 100      | 329.9947  | -0.21       | C16 H13 N Br S |

Fig. 37 EIMS of (E)-5-bromo-3-(styrylthio)-1H-indole 3e

20191120HESI+SA-03-65-2 #8 RT: 0.18 AV: 1 SB: 1 0.07 NL: 1.63E6  
T: FTMS + c ESI Full ms [100.00-800.00]

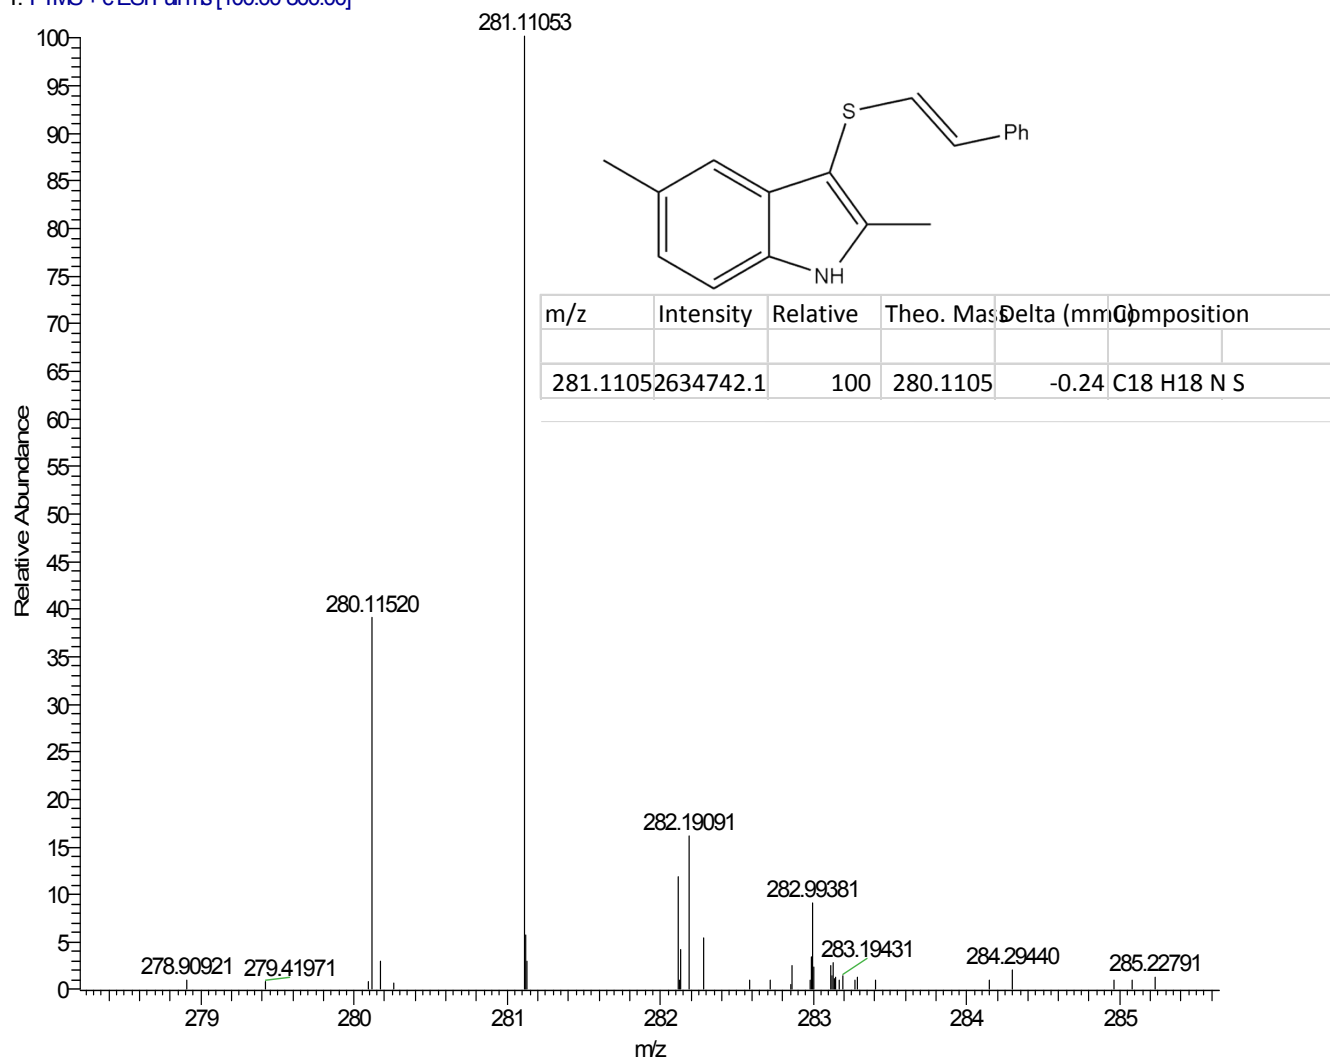

Fig. 38 EIMS of (E)-2,5-dimethyl-3-(styrylthio)-1H-indole 3f

20191120HESI+SA-03-65-4\_191128153525#15-18 RT: 0.20-0.25 AV: 4 SB: 1 0.12 NL: 7.06E4  
T: FTMS + c ESI Full ms [50.00-500.00]

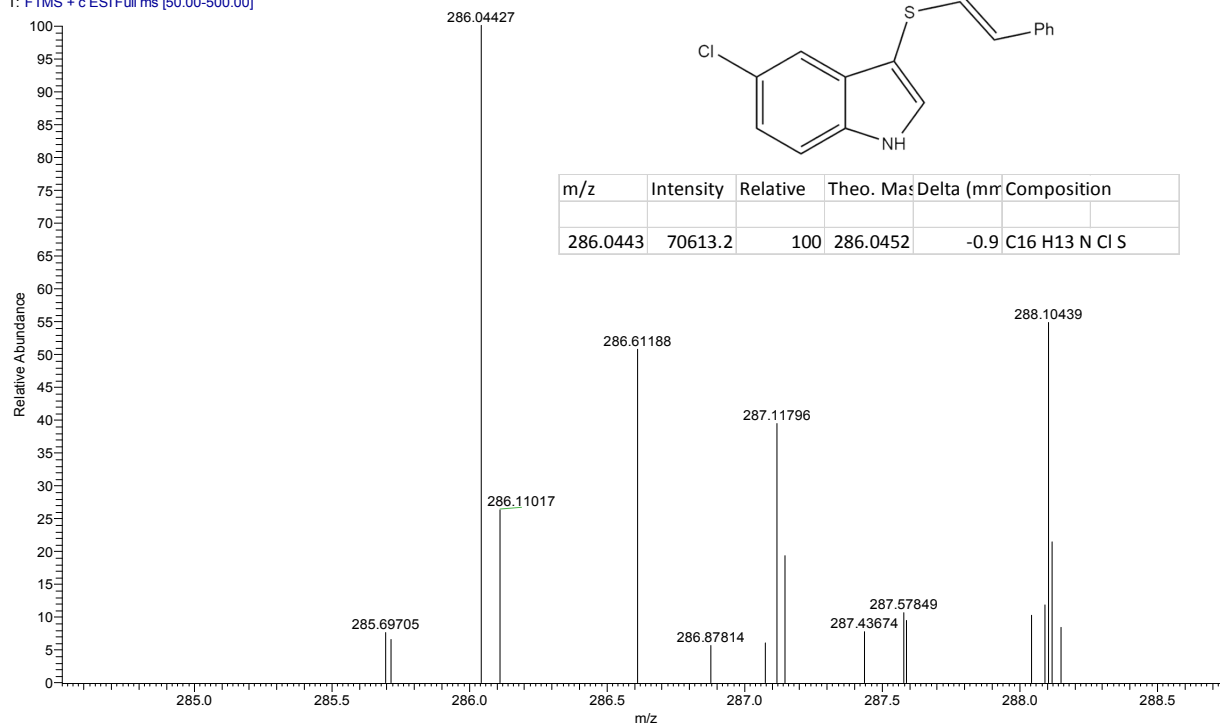

Fig. 39 EIMS of (*E*)-5-chloro-3-(styrylthio)-1*H*-indole **3g**



20191120HESI+SA-03-65-5 #27 RT: 0.70 AV: 1 SB: 1 0.09 NL: 2.15E4  
T: FTMS + cESI Full ms [100.00-800.00]

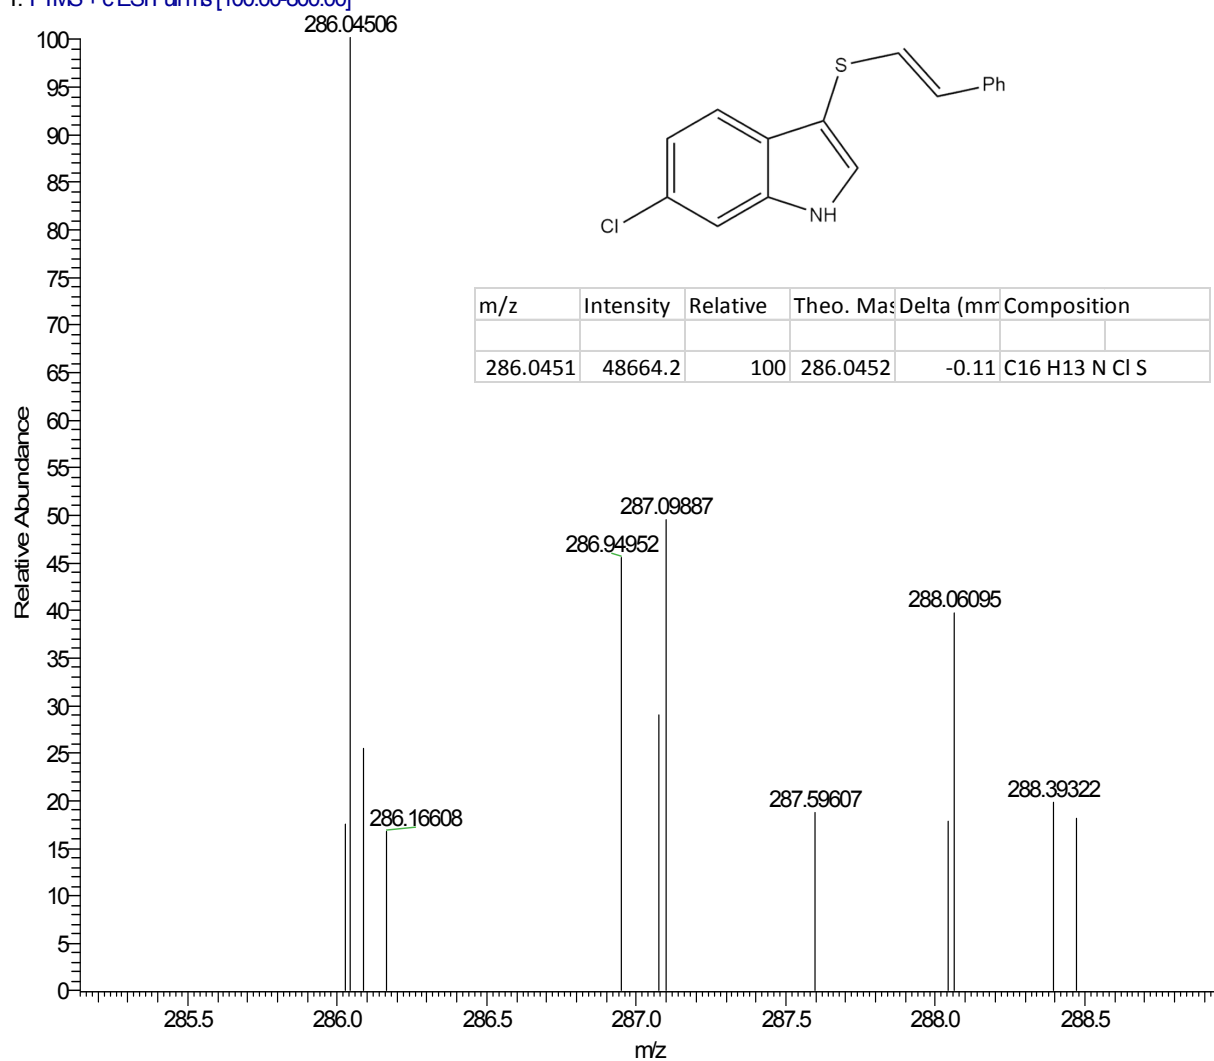

Fig. 40 EIMS of (E)-6-chloro-3-(styrylthio)-1H-indole 3k

20191120HESI+SA-03-54\_2#6 RT: 0.12 AV: 1 NL: 3.03E5  
T: FTMS + c ESI Full ms [100.00-800.00]

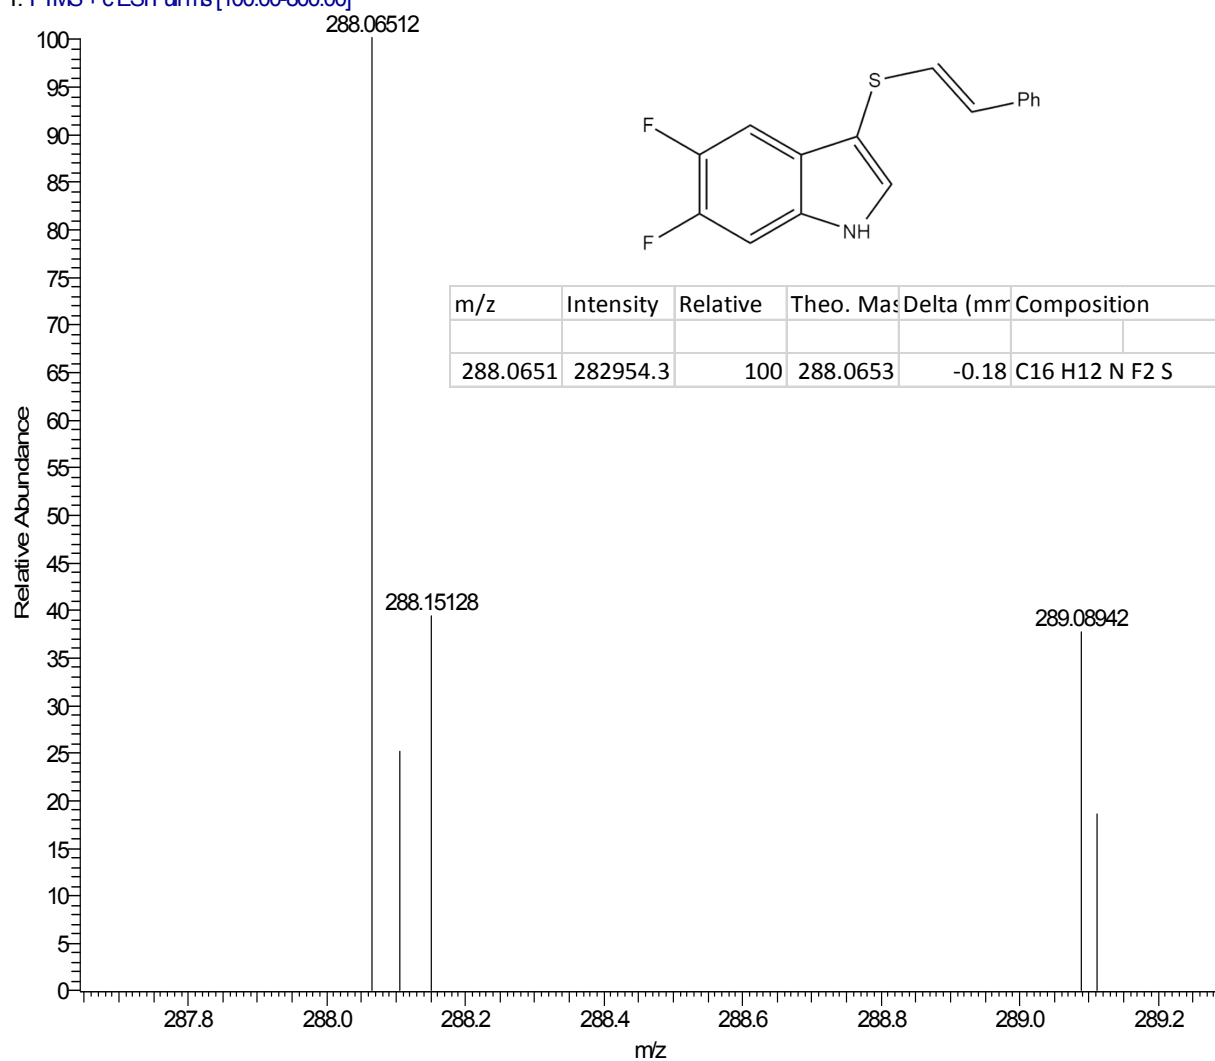

Fig. 41 EIMS of (*E*)-5,6-Difluoro-3-(styrylthio)-1*H*-indole **3j**

20191120HESI+SA-03-55 #6 RT: 0.12 AV: 1 NL: 6.89E5  
T: FTMS + cESI Full ms [100.00-800.00]

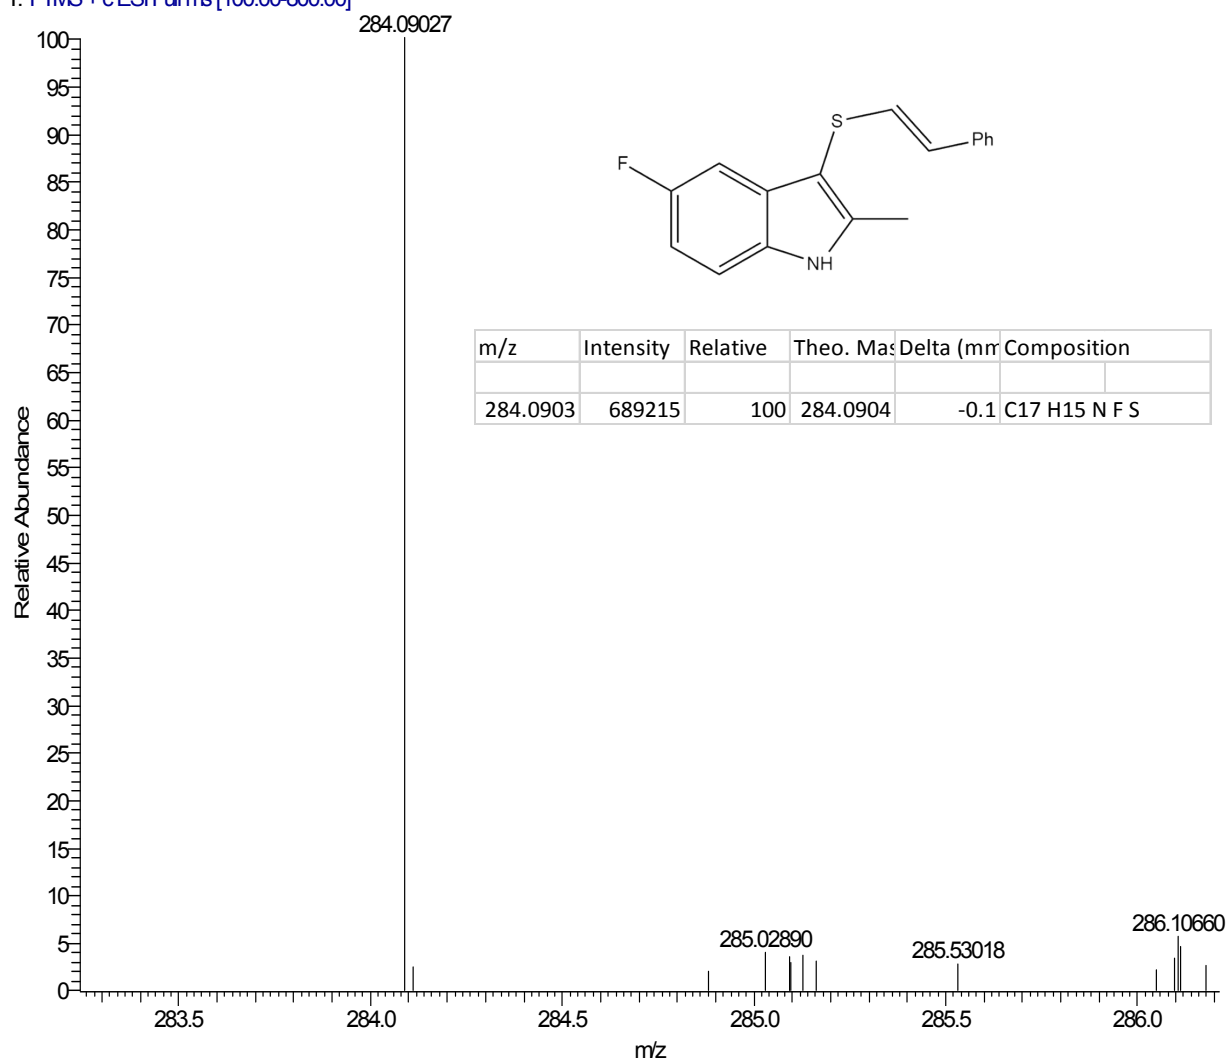

Fig. 42 EIMS of (E)-5-Fluoro-2-methyl-3-(styrylthio)-1H-indole 3i

20191120HESI+SA-03-56 #15 RT: 0.20 AV: 1 NL: 6.61E6  
T: FTMS + cESI Full ms [100.00-800.00]

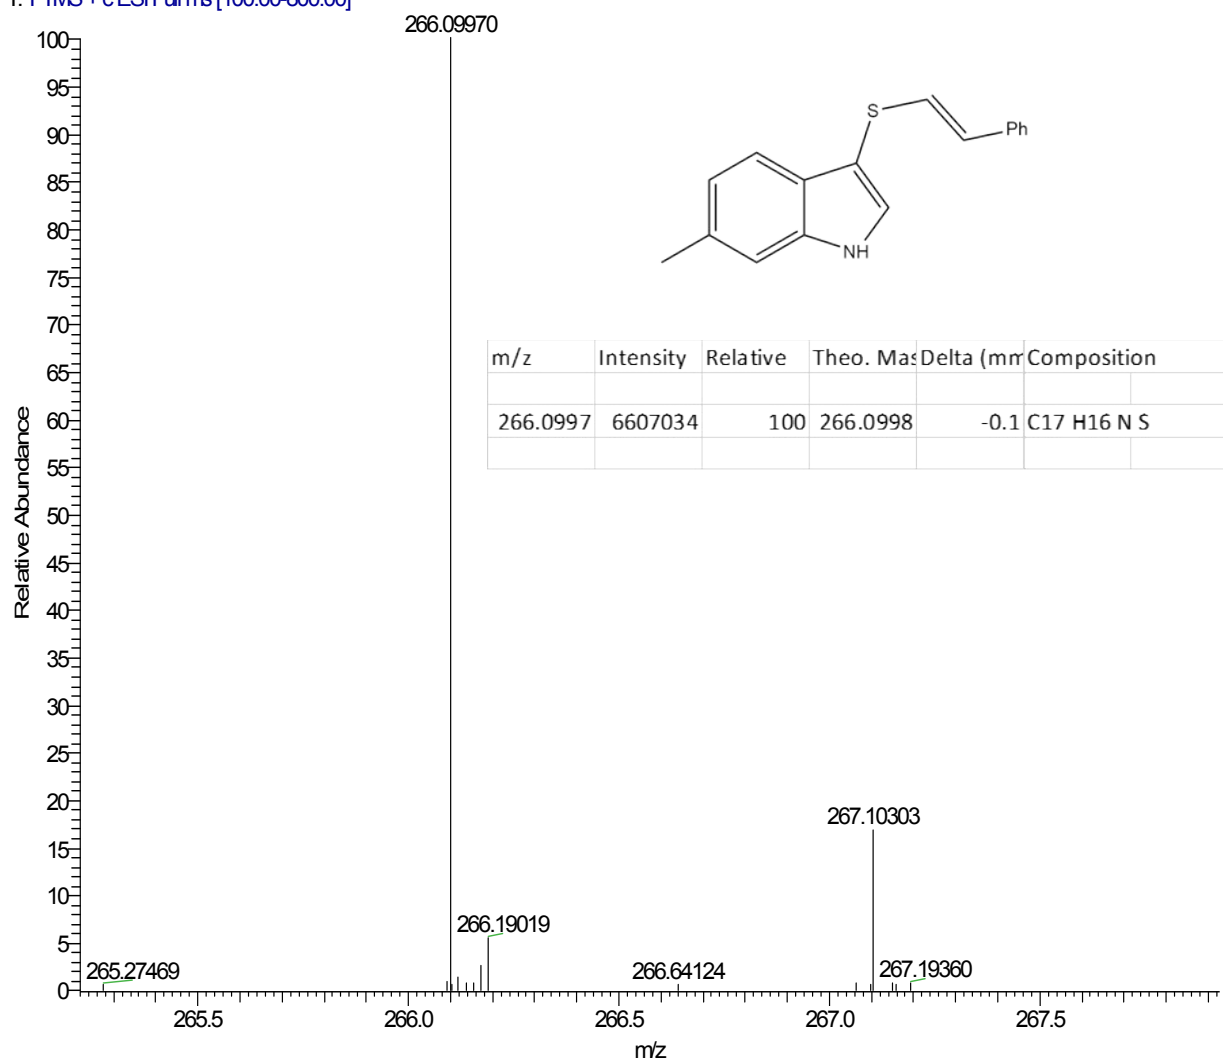

| m/z      | Intensity | Relative | Theo. Mass | Delta (m/z) | Composition |
|----------|-----------|----------|------------|-------------|-------------|
| 266.0997 | 6607034   | 100      | 266.0998   | -0.1        | C17 H16 N S |

Fig. 43 EIMS of (E)-6-methyl-3-(styrylthio)-1H-indole 3h

20191120HESI+SA-03-49 #9-14 RT: 0.20-0.34 AV: 6 SB: 1 0.04 NL: 1.67E5  
T: FTMS + cESI Full ms [100.00-800.00]

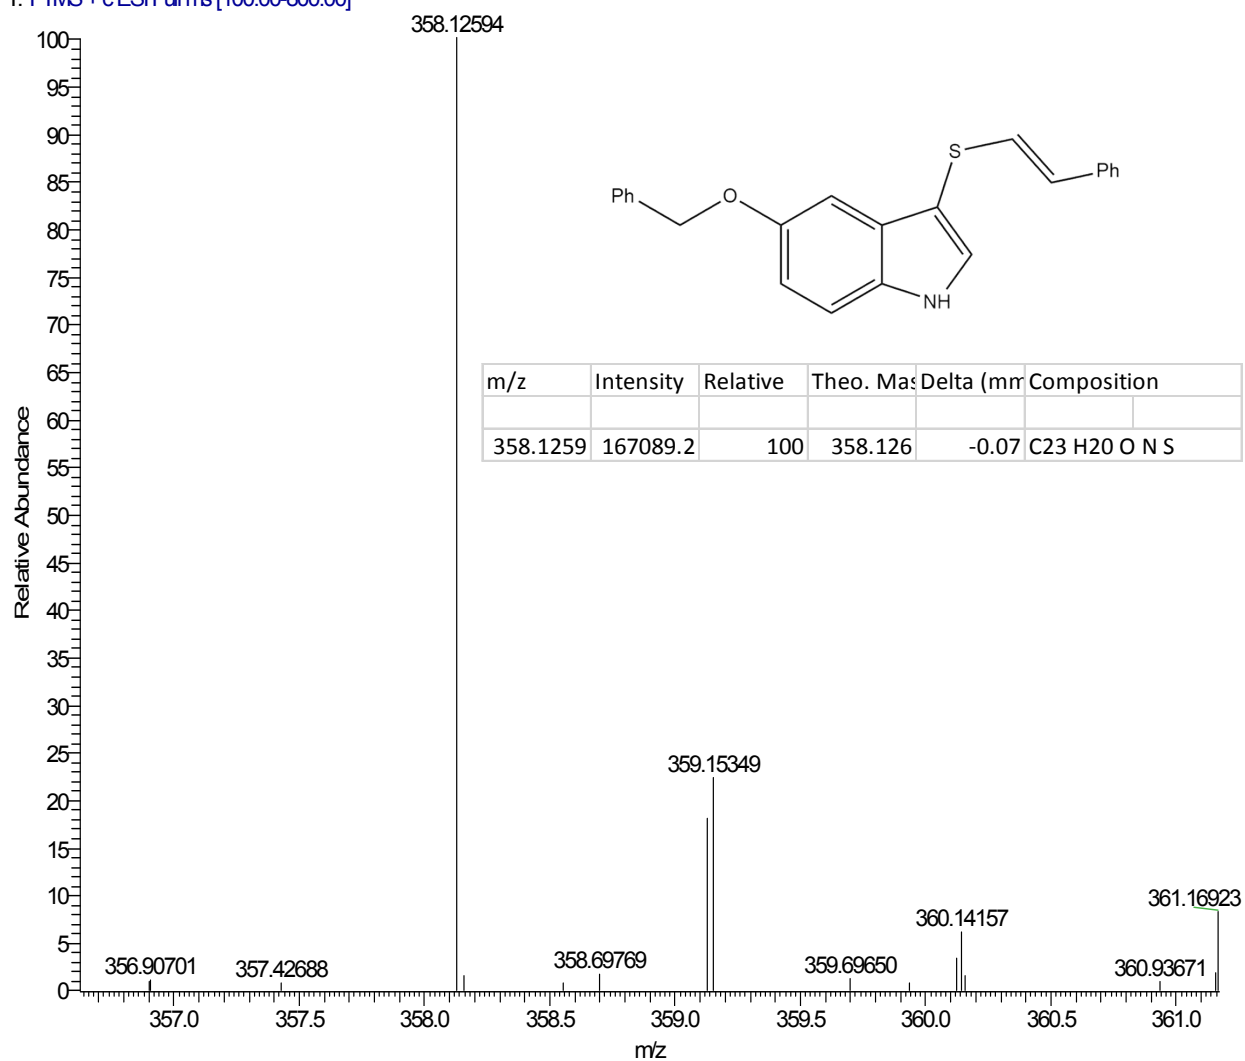

Fig. 44 EIMS of (E)-5-(Benzyloxy)-3-(styrylthio)-1H-indole **3m**

20191120HESI+SA-03-52 #11 RT: 0.26 AV: 1 SB: 1 0.04 NL: 3.07E5  
T: FTMS + cESI Full ms [100.00-800.00]

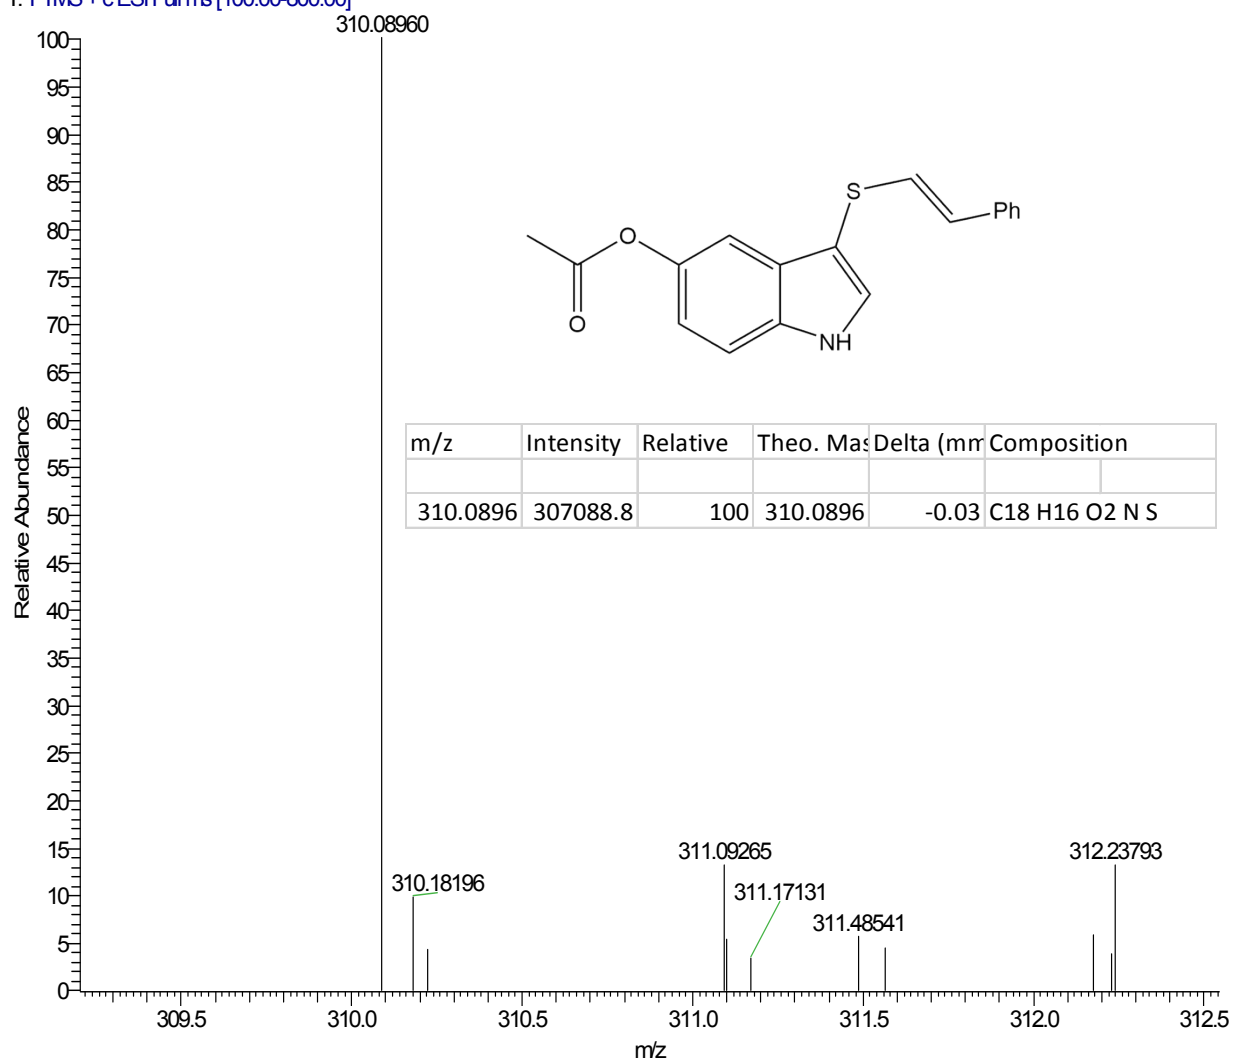

Fig. 45 EIMS of (*E*)-3-(styrylthio)-1H-indol-5-yl acetate

20191120HESI+SA-03-50 #9 RT: 0.20 AV: 1 SB: 1 0.09 NL: 4.04E5  
T: FTMS + cESI Full ms [100.00-800.00]

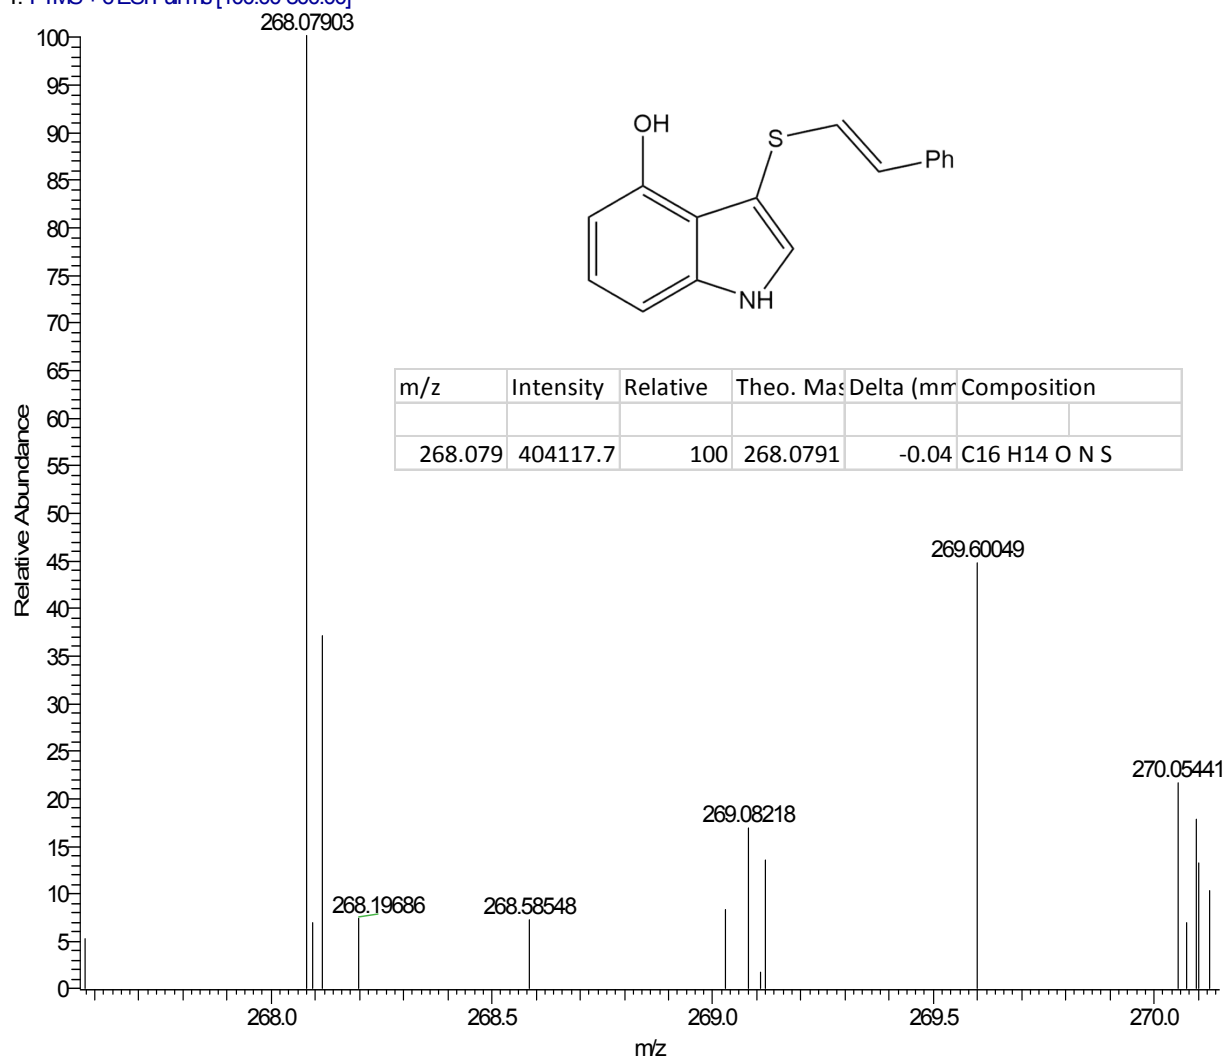

Fig. 46 EIMS of (E)-3-(styrylthio)-1H-indol-4-ol

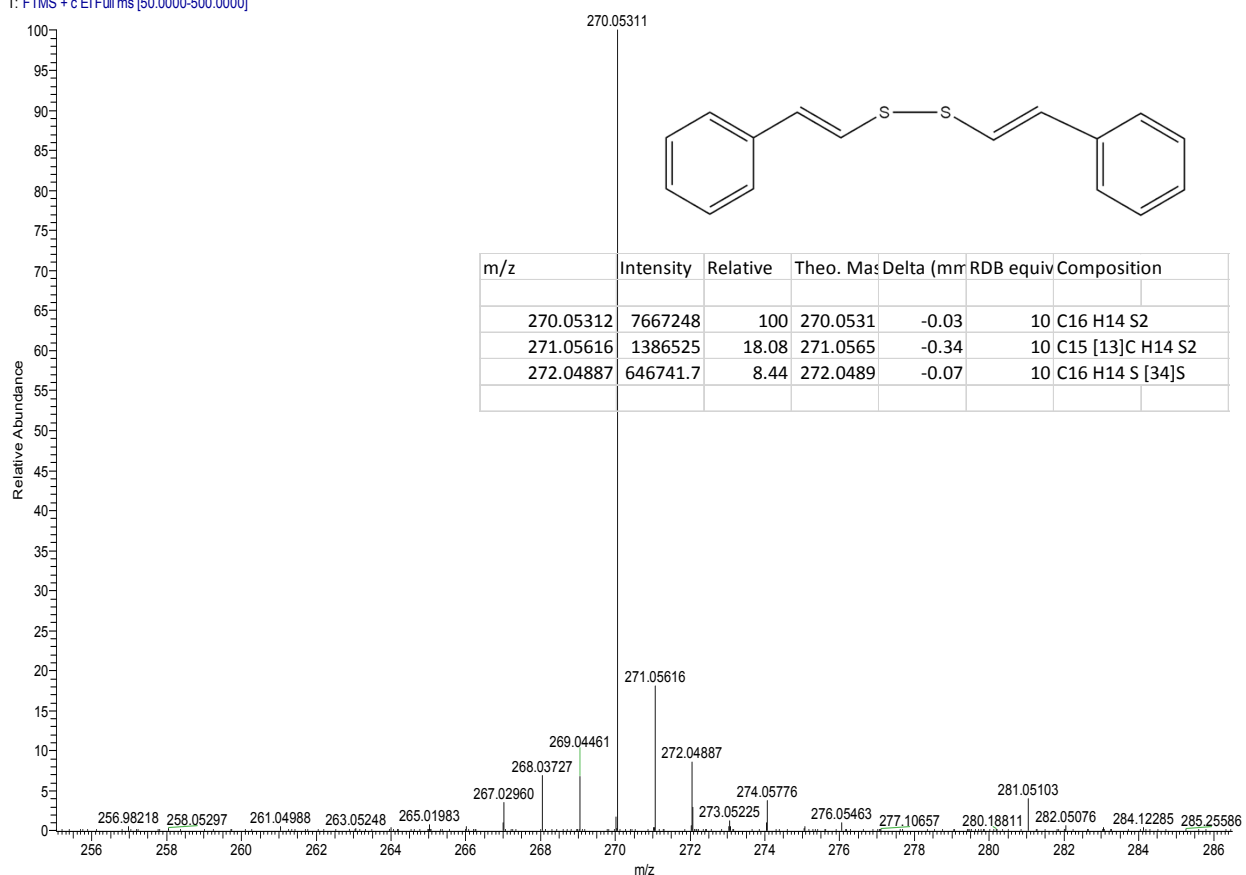

Fig. 47 EIMS of reaction intermediate **3s**

The molecular ion peak  $M/Z$  270.05312 and its isotopic peak of  $C_{16}H_{14}S_2$  were detected in E thus confirming the formation of intermediate  $Ph-CH=CH-S-S-CH=CH-Ph$ . The molecular ion peak of  $C_{16}H_{12}S$  was also detected.



20200109E+SA-03-72\_002#3483 RT: 17.38 AV: 1 NL: 1.82E9  
 T: FTMS + c EI Full ms [50.0000-500.0000]

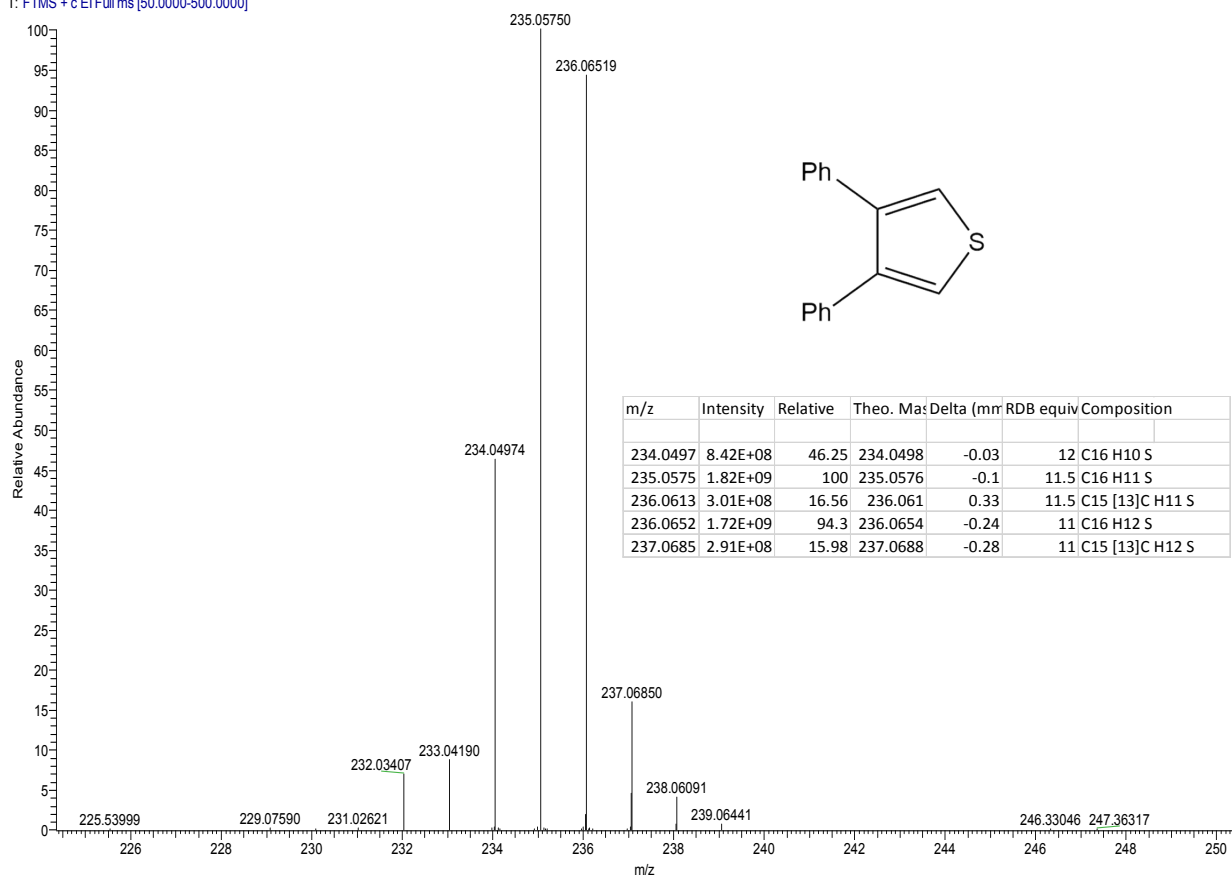

Fig. 48 EIMS of reaction intermediate **3t**
